# Supplementary material for: Seasonality, incidence and prognosis in atrial fibrillation and stroke in Denmark and New Zealand
Source: PubMed Central journal article supplement — BMJ Open. 2012 Aug 24;2(4):e001210. doi: 10.1136/bmjopen-2012-001210 (PMC3432837; doi:10.1136/bmjopen-2012-001210), 2012-08-24
Supplement: bmjopen-2012-001210.draft_revisions.pdf [file bmjopen-2012-001210.draft_revisions.pdf]

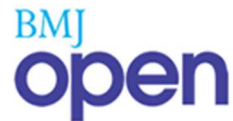

**Seasonal variation and trend in hospital admissions for stroke in patients with atrial fibrillation in Denmark and New Zealand: analysis of hospital discharge data from 1977 to 2008**

|                                 |                                                                                                                                                                                                                                                                                                                                                                                                                                                                                                                                                                                                                                 |
|---------------------------------|---------------------------------------------------------------------------------------------------------------------------------------------------------------------------------------------------------------------------------------------------------------------------------------------------------------------------------------------------------------------------------------------------------------------------------------------------------------------------------------------------------------------------------------------------------------------------------------------------------------------------------|
| Journal:                        | <i>BMJ Open</i>                                                                                                                                                                                                                                                                                                                                                                                                                                                                                                                                                                                                                 |
| Manuscript ID:                  | bmjopen-2012-001210                                                                                                                                                                                                                                                                                                                                                                                                                                                                                                                                                                                                             |
| Article Type:                   | Research                                                                                                                                                                                                                                                                                                                                                                                                                                                                                                                                                                                                                        |
| Date Submitted by the Author:   | 29-Mar-2012                                                                                                                                                                                                                                                                                                                                                                                                                                                                                                                                                                                                                     |
| Complete List of Authors:       | Christensen, Anette Luther; Aalborg AF Study Group, Cardiovascular Research Center, Aalborg Hospital, Department of Cardiology<br>Rasmussen, Lars Hvilsted; Aalborg AF Study Group, Cardiovascular Research Centre, Aalborg Hospital, Department of Cardiology<br>Baker, Michael; Otago University, Public Health<br>Lip, Gregory; University Department of Medicine<br>Dethlefsen, Claus; Aalborg AF Study Group, Cardiovascular Research Center, Aalborg Hospital, Department of Cardiology<br>Larsen, Torben Bjerregaard; Aalborg AF Study Group, Cardiovascular Research Center, Aalborg Hospital, Department of Cardiology |
| <b>Primary Subject Heading</b>: | Cardiovascular medicine                                                                                                                                                                                                                                                                                                                                                                                                                                                                                                                                                                                                         |
| Secondary Subject Heading:      | Epidemiology, Public health                                                                                                                                                                                                                                                                                                                                                                                                                                                                                                                                                                                                     |
| Keywords:                       | Stroke < NEUROLOGY, Atrial fibrillation, Seasonal variation, EPIDEMIOLOGY, Cardiology < INTERNAL MEDICINE, Poisson regression                                                                                                                                                                                                                                                                                                                                                                                                                                                                                                   |
|                                 |                                                                                                                                                                                                                                                                                                                                                                                                                                                                                                                                                                                                                                 |

SCHOLARONE™  
Manuscripts

1  
2  
3  
4 **Seasonal variation and trend in hospital admissions for stroke in patients**  
5 **with atrial fibrillation in Denmark and New Zealand: analysis of hospital**  
6 **discharge data from 1977 to 2008**  
7  
8

9  
10 Corresponding author:

11 Research Fellow Anette Luther Christensen

12 Department of Cardiology, Aalborg AF Study Group, Cardiovascular Research Center,

13 Aalborg Hospital, Aarhus University Hospital, Aalborg, Denmark

14 Aalborg Hospital Science and Innovation Center

15 Sdr. Skovvej 15

16 9000 Aalborg

17 Denmark

18 Mail: [anluc@rn.dk](mailto:anluc@rn.dk)

19 Phone: +45 9932 6885

20 Fax: +45 9932 6813  
21  
22  
23  
24

25 Head of Research Lars Hvilsted Rasmussen

26 Department of Cardiology, Aalborg AF Study Group, Cardiovascular Research Center,

27 Aalborg Hospital, Aarhus University Hospital, Aalborg, Denmark

28 Thrombosis Research Unit, Faculty of Medicine, Aalborg University, Aalborg, Denmark  
29  
30

31 Associate Professor Michael G. Baker

32 Department of Public Health, University of Otago, Wellington, New Zealand  
33  
34

35 Professor Gregory Y. H. Lip

36 University of Birmingham Centre for Cardiovascular Sciences, City Hospital, Birmingham,

37 United Kingdom  
38  
39

40 Associate Professor Claus Dethlefsen

41 Department of Cardiology, Aalborg AF Study Group, Cardiovascular Research Center,

42 Aalborg Hospital, Aarhus University Hospital, Aalborg, Denmark  
43  
44

45 Associate Professor Torben Bjerregaard Larsen

46 Department of Cardiology, Aalborg AF Study Group, Cardiovascular Research Center,

47 Aalborg Hospital, Aarhus University Hospital, Aalborg, Denmark

48 Thrombosis Research Unit, Faculty of Medicine, Aalborg University, Aalborg, Denmark  
49

50 Keywords: Stroke, Atrial fibrillation, Seasonal variation, Epidemiology, Cardiology,

51 Poisson regression  
52  
53

54 Word Count: 3584  
55  
56  
57  
58  
59  
60

**Abstract:**

Objectives: There are relatively few large studies of seasonal variation in the occurrence of stroke in patients with AF. We investigated the seasonal variation in incidence rates of hospitalizations with stroke in patients from Denmark and New Zealand.

Design: Cohort study.

Setting: Nationwide hospital discharge data from Denmark and New Zealand.

Participants: 248,103 (median age 75) subjects having a first-time hospitalization with AF in Denmark and 52,181 (median age 76) subjects in New Zealand constituted the study population.

Subjects with previous hospitalization with stroke were excluded.

Primary and secondary outcome measures: Peak-to-trough ratio of the seasonal variation in weekly incidence rates of stroke in patients with AF adjusted for an overall trend was primary outcome measure and was assessed using a log-linear Poisson regression model. Secondary outcome measures were incidence rate ratios of AF and 30-days case fatality for stroke patients.

Results: Annual incidence rate ratio for AF in Denmark was 1.059% (95%CI: 1.057-1.060) for patients aged <65 and 1.054% (95%CI: 1.053-1.055) for patients aged ≥65, whereas 1.019% (95%CI: 1.006-1.013) for patients aged <65 and 1.043% (95%CI: 1.041-1.044) for patients aged ≥65 in New Zealand. In Denmark 37,444 subjects were hospitalized with stroke, and 7,794 subjects in New Zealand, both showing peaks during winter with peak-to-trough ratios equal 1.21 and 1.27, respectively and a decreasing trend. The annual 30-days case fatality risk for stroke patients is now (2000-08) about 20% in both countries.

Conclusions: Although incidence rates of hospitalizations with stroke in patients with AF have decreased in recent years, this remains a common AF complication with a high case fatality risk. The marked winter peak in incidence rates of hospitalization with AF related stroke suggests that there are opportunities to reduce this complication. Further studies are necessary to identify how to optimize treatment of AF and prevention of stroke.

**Article Focus:**

Estimate the peak-to-trough ratio of hospitalisations with stroke in atrial fibrillation patients in a cohort study design based on discharge data from Denmark and New Zealand using a log-linear Poisson regression model.

Explore trends in incidence rates of atrial fibrillation in the entire Danish and New Zealand population.

Estimate 30-days case fatality risks for stroke in atrial fibrillation patients in Denmark and New Zealand.

**Key Messages:**

Hospitalisations with stroke in atrial fibrillation patients show a peak during winter and trough during summer in countries in opposite hemispheres.

The incidence rates of atrial fibrillation in entire Danish and New Zealand population have increased since start of registration of hospitalisations until 2008.

The 30-days case fatality risk for stroke in atrial fibrillation patients seems to have been at a constant level during 2000-2008.

**Strengths and limitations:**

The main strength of this study is that study cohort is based on two entire national populations.

The main limitation of this study was inherent to its observational nature since the negative predictive value of discharge data may not be assessed.

The cohort study design indicates associations to be explored further to identify causality through randomised controlled studies.

## 1. Introduction

Atrial fibrillation (AF) is the most common sustained cardiac rhythm disorder, and is associated with a substantial risk of mortality and morbidity from thromboembolism and especially thromboembolic stroke. Well-established risk factors for stroke in AF patients are prior stroke, advanced age, hypertension, diabetes mellitus, moderate-severe systolic dysfunction and vascular disease [1–3].

A seasonal variation in acute presentation with various cardiovascular disorders has been reported, with data on acute presentations with myocardial infarction, sudden death, rupture/dissection of aortic aneurysms, heart failure hospitalizations and venous thromboembolism [4–9] all showing a seasonal peak during winter. Acute stroke and transient ischemic attack show a similar pattern [10,11].

In addition, a seasonal variation in paroxysmal AF has been documented by 24-hour Holter electrocardiogram, with maximum and minimum incidences in autumn and summer, respectively [12]. It has been suggested that AF hospital admissions may also exhibit a seasonal variation, with the risk being modestly higher during the winter and inversely associated with outdoor temperature [13]. Nonetheless, this effect may be small and has been considered unlikely to be significant for policy or etiological research purposes [14]. However, this may reflect the limitations of relatively small single centre studies, and large “real world” population-based analyses may be needed. Indeed, using the linked Scottish Morbidity Record scheme between 1990 and 1996, there was a total of 33,582 male and 34,463 female AF hospitalizations, which showed a substantial seasonal variation in AF hospitalizations and deaths, particularly in the elderly [15].

Few studies exist on seasonal variation in occurrences of stroke and mortality risk after stroke in patients with AF. One analysis from the Danish National Registry of Patients has previously found a seasonal variation in stroke occurrence in patients with non-valvular AF but no effect of season on mortality after stroke [16]. One small series of approximately 300 Greek patients with first-ever cardio embolic acute stroke due to AF also revealed a seasonal peak during winter and a decline of stroke occurrence during summer [17].

Assuming a seasonal variation in hospital admissions with stroke in patients with AF, we would expect to see similar temporal patterns in countries from different parts of the world. However, we are unaware of any data comparing seasonal changes over a comparable time period between two countries, irrespective of seasonality shift by being in the northern or southern hemisphere. In this study we described the occurrences of hospitalizations with stroke in patients with AF, including

1  
2  
3  
4  
5  
6  
7  
8  
9  
10  
11  
12  
13  
14  
15  
16  
17  
18  
19  
20  
21  
22  
23  
24  
25  
26  
27  
28  
29  
30  
31  
32  
33  
34  
35  
36  
37  
38  
39  
40  
41  
42  
43  
44  
45  
46  
47  
48  
49  
50  
51  
52  
53  
54  
55  
56  
57  
58  
59  
60

estimating the seasonal variation in the two countries investigating the temporal patterns from the northern and southern hemisphere. Furthermore, we described the overall trend in incidence rates of hospitalization admissions for both AF and stroke in patients with AF over a twenty year period. Differences in annual 30-days case fatality risks between countries were also assessed.

## 2. Material and methods

### 2.1 Study Period and Study Population

The study period in Denmark was from 1 January 1977 and in New Zealand from 1 January 1988, both to 31 December 2008. Incident non-valvular AF, stroke and mortality was recorded using the International Classification of Diseases (ICD). Both principal and additional diagnoses were included for analysis. No discrimination was made between ischemic or hemorrhagic strokes.

The Danish cohort was identified in the Danish National Registry of Patients, starting in 1977, using the Danish Personal Identification number. This is a unique and national identification number which is part of the personal information stored in the Civil Registration System. The Danish study population in the present study included Danish residents who developed incident AF from 1977 to 2008. ICD codes were used to extract admissions for AF. The 8th revision (ICD-8) was used until 1994, and after 1994 the 10th revision (ICD-10) was used. AF and atrial flutter were coded separately in ICD-8 (codes 427.93 and 427.94), whereas in ICD-10, AF and atrial flutter have a single ICD code (I48). Therefore, atrial flutter cases have also been included in the present study. In Denmark, incidences of stroke were found in the Danish National Registry of Patients, using ICD-8 (433, 434, and 436) and ICD-10 (I63, I64).

The cohort from New Zealand was identified from 1988 to 2008, using the National Minimum Dataset. The National Minimum Dataset, managed by the New Zealand Ministry of Health, holds information on all publicly funded hospitalizations in New Zealand. Each hospitalization is linked with the patient's National Health Index (NHI) number, which is a unique number provided to each person using health and disability support services in New Zealand. This index is stored in the NHI database along with demographic details of the person. In the National Minimum Dataset ICD 9th revision (ICD-9) was used until June 1999, and after that ICD-10 was used. Similar to the Danish data, AF and atrial flutter were coded separately in ICD-9 (codes 427.31 and 427.32), whereas in ICD-10, AF and atrial flutter have a single ICD code (I48). In New Zealand, incidences of stroke were found in the National Minimum Dataset using ICD-9 (433, 434, 436) and ICD-10 (I63, I64).

1  
2  
3  
4  
5  
6  
7  
8  
9  
10  
11  
12  
13  
14  
15  
16  
17  
18  
19  
20  
21  
22  
23  
24  
25  
26  
27  
28  
29  
30  
31  
32  
33  
34  
35  
36  
37  
38  
39  
40  
41  
42  
43  
44  
45  
46  
47  
48  
49  
50  
51  
52  
53  
54  
55  
56  
57  
58  
59  
60

In Denmark annual population figures were obtained from Statistics Denmark, whereas in New Zealand only five-year population figures were available from Statistics New Zealand starting from 1996. Annual estimates for the New Zealand population from 1988 to 2008 were obtained by linear inter- and extrapolation.

## 2.2 Statistical analysis

Initial trend analysis of incidence rates of AF, ie the annual number of hospitalizations with AF divided by the annual population size, in the two countries were performed. A Poisson regression model was used to model annual incidence rates of first time hospitalizations with AF, assuming a log-linear trend. Incidence rates were estimated stratified on age groups (<65 and  $\geq 65$  years of age) and type of diagnosis (principal or additional diagnosis). Only annual incidence rates from 1988 to 2008 were analyzed. Statistical significance of interaction between trend and countries was assessed with a likelihood ratio test.

AF related stroke was defined as a first time hospitalization with stroke having previous hospital admissions for AF. A log-linear Poisson regression model was used to model the seasonal variation in weekly incidence rates of hospitalizations with AF related stroke adjusted for an overall trend. Weekly incidence rates of AF related stroke were defined as the weekly number of hospitalizations with AF related strokes divided by the weekly number of patients with AF in the entire population. The seasonal variation component was modeled as a sum of four sinusoids with frequencies one to four [18]. The overall trend was modeled using restricted cubic splines with five knots [19]. As a measurement of the seasonal variation we estimated the peak-to-trough ratio, which is an incidence rate ratio.

In addition, annual 30-days case fatality risks were calculated for both countries. For each year the total number of first time hospitalizations with AF related stroke was calculated, along with the number of death within 30 days of admission with stroke, with no discrimination on cause of death. The 30-days case fatality risk was estimated as the ratio between these annual numbers. A logit-linear logistic regression model was fitted to mortality data, assuming a logit-linear trend. Assessment on statistically significant interaction between trend and countries was performed by a likelihood ratio test.

P-values less than 5% were considered statistically significant. All analyses were performed in R version 2.13.1 [20] using the package `Peak2Trough` [21].

### 3. Results

Demographic descriptions of the two cohorts are found in Table 1. For the Danish cohort, we identified 248,103 incident hospitalizations with AF for the 32-year period from 1977 to 2008, of which 47.8% were females. For the New Zealand cohort 52,181 similar subjects were identified for the 21-year period from 1988 to 2008 (48.3% females). The median age at time of AF in the Danish cohort was 75.2 years, which was similar to the New Zealand cohort (75.8 years).

The distribution of ICD codes of AF was similar between the two cohorts, also stratified on sex (Table 1). By contrast, the distribution of diagnosis type differed in the two cohorts. In both cohorts more than half of AF diagnoses were given as a supplementary diagnosis to a principal diagnosis, with a higher proportion in New Zealand, than in Denmark. The median weekly count of AF hospitalizations in Denmark was 132, whereas in New Zealand the weekly count was 49. There was no significant sex difference in weekly counts between the cohorts.

Differences in comorbidities were apparent between Denmark and New Zealand. In Table 2, characteristics of the sub-group defined as all patients with AF having at least one comorbid disease. The distribution of age in the two countries was very similar, although congestive heart failure was more frequent in the New Zealand cohort and diabetes more frequent in the Danish cohort.

Annual incidence rates of AF hospitalizations in Denmark and New Zealand are shown in Figure 1. For both countries, the incidence rates for patients younger than 65 years of age were markedly lower than for patients above 65 years of age. A likelihood ratio test indicates a significant difference in increase over time in incidence rates between countries for both age groups. In Denmark, the incidence rates increased by 5.4% annually (95% CI: 5.3-5.5) for patients above 65 years of age compared with only an increase of 4.3% annually (95% CI: 4.1-4.4) for the same patients in New Zealand. For the younger patients the incidence rates increased by 5.9% annually (95% CI: 5.7-6.0) in Denmark and 1.9% (95% CI: 0.6-1.3) in New Zealand.

During follow-up 37,444 subjects were hospitalized with stroke (55.1% females) in the Danish cohort, which encompassed 15.1% of the entire cohort. In New Zealand the figures were 7,794 (54.3% females), which encompassed 15.0% of the cohort. The median weekly count of stroke in Denmark was 21 and 7 in New Zealand. Table 3 shows further follow-up characteristics of the two cohorts.

The seasonal variations for both countries estimated by fitting the Poisson regression model and adjusted for an overall trend are shown in Figure 2. Time for seasonal peak in both countries was winter and time for seasonal trough was summer. The peak-to-trough ratio in Denmark was 1.21, i.e.



1  
2  
3 the risk of being hospitalized with AF related stroke at peak time in winter is 21% higher compared  
4 to summer. In New Zealand the peak-to-trough ratio was 1.27.  
5  
6

7  
8 Weekly incidence rates of AF related stroke hospitalizations were decreasing in both countries  
9 during the study period; see Figure 3 which shows the estimated trends. From 1980 to 1986 the  
10 incidence rates in Denmark decreased markedly reaching a plateau of approximately 4  
11 hospitalizations per 100 person-years during the period from the late 1980s to 2002, followed by a  
12 further decline. Afterwards the incidence rates seem to decrease further. Similarly in New Zealand  
13 the incidence rates decrease markedly during the first five years from 1988 to 1992. In 1998 the  
14 incidence rate has decreased to the same level as in Denmark, though from 2004 the incidence rates  
15 increased slightly.  
16  
17  
18  
19  
20

21 The annual 30-days case fatality risks for Denmark and New Zealand are shown in Figure 4. The  
22 analysis indicated that the odds ratio for death within 30 days after stroke decreased by 2.0% (95%  
23 CI: 1.4-2.4) annually in Denmark over the entire observation period. By contrast the odds ratio  
24 increased by 4.5% (95% CI: 3.3-5.8) annually in New Zealand. Overall, the case fatality risk  
25 converged in both countries towards a value of about 20% during the most recent period.  
26  
27  
28  
29

#### 30 **4. Discussion**

31  
32 This study shows that stroke remains a common complication of AF affecting around 15% of those  
33 hospitalized with AF in Denmark and New Zealand. AF associated stroke is serious with a 20% 30-  
34 day case fatality risk in recent years (2000-08). This study found evidence of a marked seasonal  
35 variation in incidence rates of hospitalizations with AF related stroke, with a peak in winter and a  
36 trough in summer in both countries. The analysis indicated a difference in overall trend in incidence  
37 rates of hospitalizations with AF related stroke between countries, Denmark tending to have lower  
38 incidence rates, compared to New Zealand. In contrast, we showed a highly significant increase in  
39 AF over time in both countries. Furthermore, we found differences in the distributions of ICD codes  
40 and type of diagnoses in the two countries.  
41  
42  
43  
44  
45  
46  
47

48 The main limitation of this study was inherent to its observational nature. Even though the positive  
49 predictive value of the diagnosis of AF is very high in the Danish registry (93%) [22,23], the  
50 negative predictive value of such data sources is harder to assess. Consequently, studies based on  
51 hospital discharge registries may be affected by misclassification and inclusion bias - for example,  
52 by including only patients admitted to hospital with AF we might have increased the proportion of  
53 patients who were at higher risk of thromboembolic events and death. The incidence of stroke was  
54 defined by the Danish National Registry of Patients, and not all stroke diagnoses were defined by  
55  
56  
57  
58  
59  
60

1  
2  
3 cerebral imaging. The diagnosis of stroke has previously been validated in the Danish registry; with  
4 a positive predictive value of ischemic stroke of 97% [24]. Also, we are limited by the inability to  
5 differentiate between ischemic and hemorrhagic strokes, but from a Danish stroke registry we know  
6 that stroke in patients with AF is predominantly embolic [25]. AF related stroke by definition  
7 requires hospitalization and recorded diagnosis for two separate conditions, so trends in incidence  
8 rates are determined by factors that affect both of these events and may be complex to interpret.  
9 Misclassification or under-reporting of comorbidities, especially hypertension and diabetes, may  
10 have occurred [26], and we did not have data on the nature of AF in any of the cohorts. No data exist  
11 on the validity of diagnoses on AF and stroke from the National Minimum Dataset in New Zealand.  
12 Our study included patients from Denmark and New Zealand, who were treated in different settings  
13 and probably with different methods. However, the range of patients was similar regarding age and  
14 co-morbid conditions. The nature of exposures was comparable, and the definitions of outcomes  
15 were all defined by comparable ICD-coding in the two countries. The differences in health care  
16 systems in the two countries can hardly influence the referral pattern around AF. Furthermore,  
17 comparison of the two countries brings forward interesting questions when we compare with similar  
18 but smaller studies from other countries.  
19  
20  
21  
22  
23  
24  
25  
26  
27  
28  
29

30 Consistent with another study we showed that the seasonal variation in incidence rates of  
31 hospitalizations with AF related stroke in both countries was characterized by a peak in winter and  
32 trough in summer [16]. This pattern is reported for several other cardiovascular diseases [4–  
33 12,15,17]. The previously reported peak-to-trough ratio from Denmark of 1.11 [16] is similar to the  
34 peak-to-trough ratio reported in this study, however slightly lower. This may be due to the  
35 difference in resolution of data. In the present study weekly incidence rates were analyzed as  
36 opposed to monthly incidence rates in Frost et al [16]. The finding that the characteristics of the  
37 seasonal variation in both countries are similar may be important in the search for identifying  
38 underlying risk factors causing AF related stroke. Such factors may be climate factors, e.g.  
39 temperature, humidity and hours of sunshine, as well as seasonal variation in occurrences of risk  
40 factors for both AF and stroke, e.g. hypertension [27,28] and infectious diseases [29]. The  
41 difference in peak-to-trough ratio between two countries, may also lead to the identification of  
42 causes that may explain the seasonality, by considering differences between the two countries, for  
43 instance climatic differences, housing conditions, and life style patterns [30,31].  
44  
45  
46  
47  
48  
49  
50  
51  
52  
53

54 The overall trend in weekly incidence rates of hospitalizations with AF related stroke in Denmark  
55 found in this study show a markedly decrease during the first seven years from 1977 to 1984.  
56 During the late eighties and early nineties several studies regarding AF and its potential increasing  
57 risk of stroke were published [32,33], which led to introduction of oral anticoagulant treatment  
58  
59  
60

1  
2  
3 [34,35]. This concurrence reveals the prophylactic effects of anticoagulant treatment, preventing AF  
4 patients to develop stroke. However, the overall trend in incidence rates of AF related stroke in New  
5 Zealand indicates that the awareness of AF and its consequences was not as present until the early  
6 nineties. Furthermore, this study indicates that the trend in incidence rates in Denmark is decreasing  
7 further towards the end of the study period, whereas in New Zealand the trend seems to increase.  
8  
9

10  
11  
12 The risk of stroke is multi-factorial, and is affected by risk factors such as history of hypertension,  
13 current smoking, diet, physical activity, diabetes mellitus, alcohol intake, psychosocial stress and  
14 depression, cardiac causes (e.g. AF), and ratio of apolipoproteins B to A1 [36]. Indeed, greater  
15 awareness of some risk factors e.g. blood pressure control and smoking cessation may have  
16 contributed to a lowering of AF related stroke incidence over this period. Also, a managed care  
17 approach to high risk patients (e.g. recent transient ischemic attack) may have led to the reduction in  
18 stroke hospitalizations in more recent years [37]. This is clearly a positive observation, given that  
19 AF related strokes are associated with a higher mortality, as well as a greater morbidity and  
20 disability.  
21  
22  
23  
24  
25  
26  
27

28 Whilst the annual incidence rates of hospitalizations with AF were lower in New Zealand compared  
29 with Denmark for both age groups there was still a highly significant increase over time in incidence  
30 rates for both countries and both age groups. This is consistent with reported increasing trends in  
31 hospitalization for AF in the United States, between 1985 and 1999 [38]. In the analysis by  
32 Wattigney et al, US hospitalizations for AF increased dramatically (2- to 3-fold) in the period 1985-  
33 1999. In their study, women were hospitalized with AF more often than men on an annual basis,  
34 although the age-standardized prevalence of hospitalizations was greater in men than women.  
35 Women hospitalized with AF tended to be older than men, which our results confirm.  
36  
37  
38  
39  
40  
41

42 Unsurprisingly we found the median age of both Danish and New Zealand cohorts to be similar  
43 (approximately 75 years). The incidence rates for patients younger than 65 years of age were much  
44 lower than for patients above 65 years of age. Indeed, these observations are consistent with other  
45 epidemiological data including analyses of hospitalization data [22,38–40]. There was no significant  
46 sex difference in weekly counts in either cohort. Of note, the median weekly count of AF  
47 hospitalizations and AF related strokes in Denmark were higher than in New Zealand. The reasons  
48 for this remain uncertain, but may reflect the different demographic profile, differences in referral  
49 patterns and awareness of the disease as well as differences in associated comorbidities. Taking into  
50 account the variation in distribution of types of diagnoses of AF, where in New Zealand nearly 70%  
51 of the AF diagnoses were in addition to another principal diagnosis, compared with nearly 60% in  
52 Denmark, the difference in incidence rates of hospitalizations with AF may be due to differences in  
53 the health system in the two countries. In Denmark the health system is funded by taxes, and all  
54  
55  
56  
57  
58  
59  
60

1  
2  
3 contacts with the health system are free of charge for the patient. By contrast, in New Zealand only  
4 parts of the health system are fully funded by taxes, notably hospital care, whereas visits to the  
5 general practitioner are subject to a small user charge. Given the unspecific symptoms of AF,  
6 patients might be less likely to contact their general practitioner when experiencing symptoms with  
7 palpitations and shortness of breath. This is supported by the fact that AF patients with stroke often  
8 have non-recognized AF [25]. Consequently, a larger proportion of the New Zealand population  
9 may be undiagnosed with AF than in Denmark.  
10

11  
12 In the present study, we found significant differences in comorbidities (Table 2). Despite the similar  
13 age distribution between countries, congestive heart failure was more frequent in the New Zealand  
14 cohort and diabetes more frequent in the Danish cohort. This difference may reflect the fact that  
15 additional diagnoses for AF are used more frequently in the New Zealand cohort than in the Danish,  
16 and may be a random finding in patients referred with symptoms of congestive heart failure. The  
17 reason for the highly significant differences in all variables even in what seems very similar, e.g.  
18 hypertension, is the high number of observations in this study comprising more than three hundred  
19 thousand patients.  
20

21  
22 This study found that there was a minor decrease in the 30-days case fatality risk for AF related  
23 strokes during the study period in Denmark, but an evident increase in New Zealand. Our findings  
24 indicate that the 30-days case fatality risk in Denmark was higher than in New Zealand until the late  
25 nineties, whereas afterwards the difference does not seem evident. This may be due to differences in  
26 anticoagulant treatments between the two countries but this also remains tentative.  
27

## 28 29 30 31 32 33 34 35 36 37 38 39 40 41 42 43 44 45 46 47 48 49 50 51 52 53 54 55 56 57 58 59 60

### 5. Conclusion

This is the first concurrent analysis of the epidemiology of AF related stroke in nationwide  
population data from two western countries, one in the northern hemisphere and one in the southern  
hemisphere. We showed that the incidence rates of hospitalization with stroke in patients with AF  
exhibit a marked seasonal variation in both countries, which is characterized by a peak in winter and  
a trough in summer. Both countries have also shown a downward trend in hospitalizations with  
stroke in patients with AF, despite a pronounced increase in AF hospitalizations. This trend,  
seasonal variation and differences in comorbidities and distribution of types of diagnoses between  
the two countries, merit further study. Such research could help us better understand the clinical  
epidemiology and public health impact of AF and its complications and identify opportunities for  
better prevention of AF and stroke.

## References

- 1 Atrial Fibrillation Working Group. Independent predictors of stroke in patients with atrial fibrillation: a systematic review. *Neurology* 2007;**69**:546–54.
- 2 Hughes M, Lip GYH. Stroke and thromboembolism in atrial fibrillation: a systematic review of stroke risk factors, risk stratification schema and cost effectiveness data. *J Thromb Haemostasis* 2008;**99**:295–304.
- 3 Rasmussen LH, Larsen TB, Due KM, *et al.* Impact of vascular disease in predicting stroke and death in patients with atrial fibrillation: the Danish Diet, Cancer and Health cohort study. *J Thromb Haemostasis* 2011;**9**:1301–7.
- 4 Spencer FA, Goldberg RJ, Becker RC, *et al.* Seasonal distribution of acute myocardial infarction in the second National Registry of Myocardial Infarction. *J Am Coll Cardiol* 1998;**31**:1226–33.
- 5 Manfredini R, Manfredini F, Boari B, *et al.* Seasonal and weekly patterns of hospital admissions for nonfatal and fatal myocardial infarction. *Am J Emerg Med* 2009;**27**:1097–103.
- 6 Arntz HR, Willich SN, Schreiber C, *et al.* Diurnal, weekly and seasonal variation of sudden death. Population-based analysis of 24,061 consecutive cases. *Eur Heart J* 2000;**21**:315–20.
- 7 Mehta RH, Manfredini R, Hassan F, *et al.* Chronobiological Patterns of Acute Aortic Dissection. *Circulation* 2002;**106**:1110–5.

- 1  
2  
3  
4 8 Gallerani M, Boari B, Smolensky MH, *et al.* Seasonal variation in occurrence of  
5  
6 pulmonary embolism: analysis of the database of the Emilia-Romagna region, Italy.  
7  
8 *Chronobiol Int J Biol Med Rhythm Res* 2007;**24**:143–60.  
9
- 10  
11 9 Gallerani M, Boari B, Manfredini F, *et al.* Seasonal variation in heart failure  
12  
13 hospitalization. *Clin Cardiol* 2011;**34**:389–94.  
14  
15
- 16  
17 10 Manfredini R, Gallerani M, Portaluppi F, *et al.* Chronobiological Patterns of Onset of  
18  
19 Acute Cerebrovascular Diseases. *Thromb Res* 1997;**88**:451–63.  
20  
21
- 22  
23 11 Manfredini R, Manfredini F, Boari B, *et al.* Temporal patterns of hospital admissions  
24  
25 for transient ischemic attack: a retrospective population-based study in the Emilia-  
26  
27 Romagna region of Italy. *Clin Appl Thromb Hemost* 2010;**16**:153–60.  
28  
29
- 30  
31 12 Watanabe E, Kuno Y, Takasuga H, *et al.* Seasonal variation in paroxysmal atrial  
32  
33 fibrillation documented by 24-hour Holter electrocardiogram. *Heart Rhythm*  
34  
35 2007;**4**:27–31.  
36  
37
- 38  
39 13 Frost L, Johnsen SP, Pedersen L, *et al.* Seasonal Variation in Hospital Discharge  
40  
41 Diagnosis of Atrial Fibrillation: A Population-Based Study. *Epidemiology*  
42  
43 2002;**13**:211–5.  
44  
45
- 46  
47 14 Upshur REG, Moineddin R, Crighton EJ, *et al.* Is there a clinically significant  
48  
49 seasonal component to hospital admissions for atrial fibrillation? *BMC Health Serv*  
50  
51 *Res* 2004;**4**:5.  
52  
53
- 54  
55 15 Murphy NF, Stewart S, MacIntyre K, *et al.* Seasonal variation in morbidity and  
56  
57 mortality related to atrial fibrillation. *Int J Cardiol* 2004;**97**:283–8.  
58  
59  
60

- 1  
2  
3  
4 16 Frost L, Vukelic Andersen L, Mortensen LS, *et al.* Seasonal variation in stroke and  
5  
6 stroke-associated mortality in patients with a hospital diagnosis of nonvalvular atrial  
7  
8 fibrillation or flutter. A population-based study in Denmark. *Neuroepidemiology*  
9  
10 2006;**26**:220–5.  
11  
12  
13  
14 17 Spengos K, Vemmos K, Tsivgoulis G, *et al.* Diurnal and seasonal variation of stroke  
15  
16 incidence in patients with cardioembolic stroke due to atrial fibrillation.  
17  
18 *Neuroepidemiology* 2003;**22**:204–10.  
19  
20  
21  
22 18 Fischer T, Lundbye-Christensen S, Johnsen SP, *et al.* Secular trends and seasonality  
23  
24 in first-time hospitalization for acute myocardial infarction--a Danish population-  
25  
26 based study. *Int J Cardiol* 2004;**97**:425–31.  
27  
28  
29  
30 19 Harrell FE. *Regression Modelling Strategies - with Applications to Linear Models,*  
31  
32 *Logistic regression and Survival Analysis.* 1st ed. Springer 2001.  
33  
34  
35  
36 20 R Development Core Team. R: A Language and Environment for Statistical  
37  
38 Computing. 2010.<http://www.r-project.org>  
39  
40  
41 21 Christensen AL. Peak2Trough: Estimation of the peak-to-trough ratio of a seasonal  
42  
43 variation component. 2011.  
44  
45  
46  
47 22 Frost L, Andersen LV, Vestergaard P, *et al.* Trend in mortality after stroke with atrial  
48  
49 fibrillation. *Am J Med* 2007;**120**:47–53.  
50  
51  
52  
53 23 Rix TA, Riahi S, Overvad K, *et al.* Validity of the diagnoses atrial fibrillation and  
54  
55 atrial flutter in a Danish patient registry. *Scand Cardiovasc J* Published Online First:  
56  
57 8 March 2012. doi:10.3109/14017431.2012.673728  
58  
59  
60

- 1  
2  
3  
4 24 Krarup L-H, Boysen G, Janjua H, *et al.* Validity of stroke diagnoses in a National  
5 Register of Patients. *Neuroepidemiology* 2007;**28**:150–4.  
6  
7  
8  
9 25 Jørgensen HS, Plesner A-M, Hübbe P, *et al.* Marked Increase of Stroke Incidence in  
10 Men Between 1972 and 1990 in Frederiksberg, Denmark. *Stroke* 1992;**23**:1701–4.  
11  
12  
13  
14 26 Chen F, Florkowski CM, Dever M, *et al.* Death Certification and New Zealand  
15 Health Information Service (NZHIS) statistics for diabetes mellitus: an under-  
16 recognised health problem. *Diabetes Res Clin Pract* 2004;**63**:113–8.  
17  
18  
19  
20  
21  
22 27 Brennan PJ, Greenberg G, Miall WE, *et al.* Seasonal variation in arterial blood  
23 pressure. *Br Med J* 1982;**285**:919–23.  
24  
25  
26  
27  
28 28 Kochar MS, Ristow S, Kalbfleisch JH. Effect of seasonal temperature change on  
29 blood pressure in a treated hypertensive population. *J Clin Hypertens* 1985;**1**:49–52.  
30  
31  
32  
33 29 Fisman DN. Seasonality of infectious diseases. *Annu Rev Publ Health* 2007;**28**:127–  
34 43.  
35  
36  
37  
38  
39 30 Howden-Chapman P, Crane J, Chapman R, *et al.* Improving health and energy  
40 efficiency through community-based housing interventions. *Int J Public Health*  
41 2011;**56**:583–8.  
42  
43  
44  
45  
46  
47 31 Hales S, Blakely T, Foster RH, *et al.* Seasonal patterns of mortality in relation to  
48 social factors. *J Epidemiol Community* 2012;**66**:379–384.  
49  
50  
51  
52  
53 32 Petersen P, Godtfredsen J. Embolic complications in paroxysmal atrial fibrillation.  
54 *Stroke* 1986;**17**:622–6.  
55  
56  
57  
58  
59  
60



- 1  
2  
3  
4 33 Atrial Fibrillation Investigators. Risk factors for stroke and efficacy of antithrombotic  
5 therapy in atrial fibrillation. Analysis of pooled data from five randomized controlled  
6 trials. *Arch Intern Med* 1994;**154**:1449–57.  
7  
8  
9  
10  
11 34 Stroke Prevention. Warfarin versus aspirin for prevention of thromboembolism in  
12 atrial fibrillation: Stroke Prevention in Atrial Fibrillation II Study. *Lancet*  
13 1994;**343**:687–91.  
14  
15  
16  
17  
18  
19 35 Frost L, Engholm G, Møller H, *et al*. Decrease in mortality in patients with a hospital  
20 diagnosis of atrial fibrillation in Denmark during the period 1980-1993. *Eur Heart J*  
21 1999;**20**:1592–9.  
22  
23  
24  
25  
26  
27 36 O’Donnell MJ, Xavier D, Liu L, *et al*. Risk factors for ischaemic and intracerebral  
28 haemorrhagic stroke in 22 countries (the INTERSTROKE study): a case-control  
29 study. *Lancet* 2010;**376**:112–23.  
30  
31  
32  
33  
34  
35 37 Rothwell PM, Algra A, Amarenco P. Medical treatment in acute and long-term  
36 secondary prevention after transient ischaemic attack and ischaemic stroke. *Lancet*  
37 2011;**377**:1681–92.  
38  
39  
40  
41  
42  
43 38 Wattigney WA, Mensah GA, Croft JB. Increasing trends in hospitalization for atrial  
44 fibrillation in the United States, 1985 through 1999: implications for primary  
45 prevention. *Circulation* 2003;**108**:711–6.  
46  
47  
48  
49  
50  
51 39 Stewart S, MacIntyre K, MacLeod MM, *et al*. Trends in hospital activity, morbidity  
52 and case fatality related to atrial fibrillation in Scotland, 1986-1996. *Eur Heart J*  
53 2001;**22**:693–701.  
54  
55  
56  
57  
58  
59  
60

40 Humphries KH, Jackevicius C, Gong Y, *et al.* Population rates of hospitalization for  
 atrial fibrillation/flutter in Canada. *Can J Cardiol* 2004;**20**:869–76.

Table 1: Demographic description of patients with atrial fibrillation in Denmark and New Zealand

|                                    | Total   |             | Women   |             | Men     |             |
|------------------------------------|---------|-------------|---------|-------------|---------|-------------|
| <b>Denmark</b>                     |         |             |         |             |         |             |
| Number of AF                       | 248,103 | (100%)      | 118,681 | (47.8%)     | 129,422 | (52.2%)     |
| Age at AF, years<br>(median (IQR)) | 75.2    | (66.2-82.4) | 78.4    | (70.7-84.5) | 72      | (62.5-79.6) |
| AF                                 |         |             |         |             |         |             |
| 427.31 (ICD-8)                     | 80,076  | (32.3%)     | 39,811  | (33.5%)     | 40,265  | (31.1%)     |
| 427.32 (ICD-8)                     | 7,409   | (3.0%)      | 2,978   | (2.5%)      | 4,431   | (3.4%)      |
| I48 (ICD-10)                       | 160,618 | (64.7%)     | 75,892  | (64.0%)     | 84,726  | (65.5%)     |
| Diagnosis type                     |         |             |         |             |         |             |
| Principal                          | 104,307 | (42.0%)     | 47,807  | (40.3%)     | 56,500  | (43.7%)     |
| Additional                         | 143,796 | (58.0%)     | 70,874  | (59.7%)     | 72,922  | (56.3%)     |
| Weekly counts<br>(median (IQR))    | 132     | (94-205)    | 63      | (46-96)     | 68      | (48-108)    |
| <b>New Zealand</b>                 |         |             |         |             |         |             |
| Number of AF                       | 52,181  | (100%)      | 25,186  | (48.3%)     | 26,995  | (51.7%)     |
| Age at AF, years<br>(median (IQR)) | 75.8    | (67.5-82.4) | 78.1    | (70.4-84.3) | 73.6    | (65.1-80.3) |
| AF                                 |         |             |         |             |         |             |
| 427.93 (ICD-9)                     | 18,367  | (35.2%)     | 8,968   | (35.6%)     | 9,399   | (34.8%)     |
| 427.94 (ICD-9)                     | 1,424   | (2.7%)      | 529     | (2.1%)      | 895     | (3.3%)      |
| I48 (ICD-10)                       | 32,390  | (62.1%)     | 15,689  | (62.3%)     | 16,701  | (61.9%)     |
| Diagnosis type                     |         |             |         |             |         |             |
| Principal                          | 15,660  | (30.0%)     | 7,876   | (31.3%)     | 7,784   | (28.8%)     |
| Additional                         | 36,521  | (70.0%)     | 17,310  | (68.7%)     | 19,211  | (71.2%)     |
| Weekly counts<br>(median (IQR))    | 49      | (32-61)     | 23      | (15-30)     | 25      | (16.75-32)  |

AF: Atrial fibrillation, ICD: International Classification of Diseases, IQR: Inter quartile range

1  
2  
3  
4  
5  
6  
7  
8  
9  
10  
11  
12  
13  
14  
15  
16  
17  
18  
19  
20  
21  
22  
23  
24  
25  
26  
27  
28  
29  
30  
31  
32  
33  
34  
35  
36  
37  
38  
39  
40  
41  
42  
43  
44  
45  
46  
47  
48  
49  
50  
51  
52  
53  
54  
55  
56  
57  
58  
59  
60

12

For peer review only

Table 2: Comorbidities and age distribution among patients hospitalized with atrial fibrillation having at least one comorbid disorder in Denmark and New Zealand

|                                                                          | Denmark | New Zealand |
|--------------------------------------------------------------------------|---------|-------------|
| <b>Characteristics</b>                                                   |         |             |
| Percentage of all patients with AF having at least one comorbid disorder | 32.2    | 53.1        |
| Age, years (at time of AF)                                               |         |             |
| Age $\geq 75$ years                                                      | 55.8    | 56.3        |
| Age 65-74                                                                | 27.9    | 26.1        |
| Women                                                                    | 46.7    | 46.5        |
| Congestive heart failure                                                 | 29.4    | 53.4        |
| Hypertension                                                             | 35.1    | 22.2        |
| Diabetes                                                                 | 19.0    | 8.2         |
| Acute myocardial infarction                                              | 31.5    | 29.0        |
| Peripheral arterial disease                                              | 10.6    | 10.9        |
| Coronary artery disease                                                  | 34.7    | 31.3        |

The comorbid conditions were registered if they preceded an incident diagnosis of AF.

Data are percentages.

Table 3: Demographic description of patients with atrial fibrillation related strokes in Denmark and New Zealand

|                                     | Total  |             | Women  |             | Men    |             |
|-------------------------------------|--------|-------------|--------|-------------|--------|-------------|
| <b>Denmark</b>                      |        |             |        |             |        |             |
| Number of strokes                   | 37,444 | (100%)      | 20,612 | (55%)       | 16,832 | (45%)       |
| Age at stroke, years (median (IQR)) | 79.4   | (73-84.8)   | 81.5   | (75.8-86.3) | 76.7   | (69.7-82.3) |
| Stroke                              |        |             |        |             |        |             |
| 433 (ICD-8)                         | 2,960  | (7.9%)      | 1,556  | (7.5%)      | 1,404  | (8.3%)      |
| 434 (ICD-8)                         | 1,312  | (3.5%)      | 642    | (3.1%)      | 670    | (4%)        |
| 436 (ICD-8)                         | 8,949  | (23.9%)     | 5,107  | (24.8%)     | 3,842  | (22.8%)     |
| I63 (ICD-10)                        | 9,771  | (26.1%)     | 5,262  | (25.5%)     | 4,509  | (26.8%)     |
| I64 (ICD-10)                        | 14,452 | (38.6%)     | 8,045  | (39%)       | 6,407  | (38.1%)     |
| Diagnosis type                      |        |             |        |             |        |             |
| Principal                           | 28,010 | (74.8%)     | 15,630 | (75.8%)     | 12,380 | (73.6%)     |
| Additional                          | 9,434  | (25.2%)     | 4,982  | (24.2%)     | 4,452  | (26.4%)     |
| Weekly counts (median (IQR))        | 22     | (17-27)     | 12     | (9-15)      | 10     | (7-13)      |
| Time to stroke, days (median (IQR)) | 332    | (0-1508.2)  | 319    | (0-1466.2)  | 348    | (0-1563)    |
| <b>New Zealand</b>                  |        |             |        |             |        |             |
| Number of strokes                   | 7,794  | (100%)      | 4,232  | (54.3%)     | 3,562  | (45.7%)     |
| Age at stroke, years (median (IQR)) | 79.8   | (72.8-85.3) | 81.6   | (75.3-86.7) | 77.6   | (70.5-83.5) |
| Stroke                              |        |             |        |             |        |             |
| 433 (ICD-9)                         | 115    | (1.5%)      | 44     | (1%)        | 71     | (2%)        |
| 434 (ICD-9)                         | 700    | (9%)        | 358    | (8.5%)      | 342    | (9.6%)      |
| 436 (ICD-9)                         | 1,512  | (19.4%)     | 815    | (19.3%)     | 697    | (19.6%)     |
| I63 (ICD-10)                        | 3,581  | (45.9%)     | 1,999  | (47.2%)     | 1,582  | (44.4%)     |
| I64 (ICD-10)                        | 1,886  | (24.2%)     | 1,016  | (24%)       | 870    | (24.4%)     |
| Diagnosis type                      |        |             |        |             |        |             |
| Principal                           | 6,150  | (78.9%)     | 3,338  | (78.9%)     | 2,812  | (78.9%)     |
| Additional                          | 1,644  | (21.1%)     | 894    | (21.1%)     | 750    | (21.1%)     |
| Weekly counts (median (IQR))        | 7      | (4-9)       | 4      | (2-5)       | 3      | (2-5)       |
| Time to stroke, days (median (IQR)) | 584    | (5-1724)    | 590    | (9-1705.5)  | 576    | (0-1745.8)  |

AF: atrial fibrillation, ICD: International Classification of Diseases, IQR: Inter quartile range

1  
2  
3  
4  
5  
6  
7  
8  
9  
10  
11  
12  
13  
14  
15  
16  
17  
18  
19  
20  
21  
22  
23  
24  
25  
26  
27  
28  
29  
30  
31  
32  
33  
34  
35  
36  
37  
38  
39  
40  
41  
42  
43  
44  
45  
46  
47  
48  
49  
50  
51  
52  
53  
54  
55  
56  
57  
58  
59  
60

Figure 1: Observed annual incidence rates of first-time hospitalizations with a principal or additional diagnosis of atrial fibrillation per 1,000 person-years for the Danish and New Zealand population.

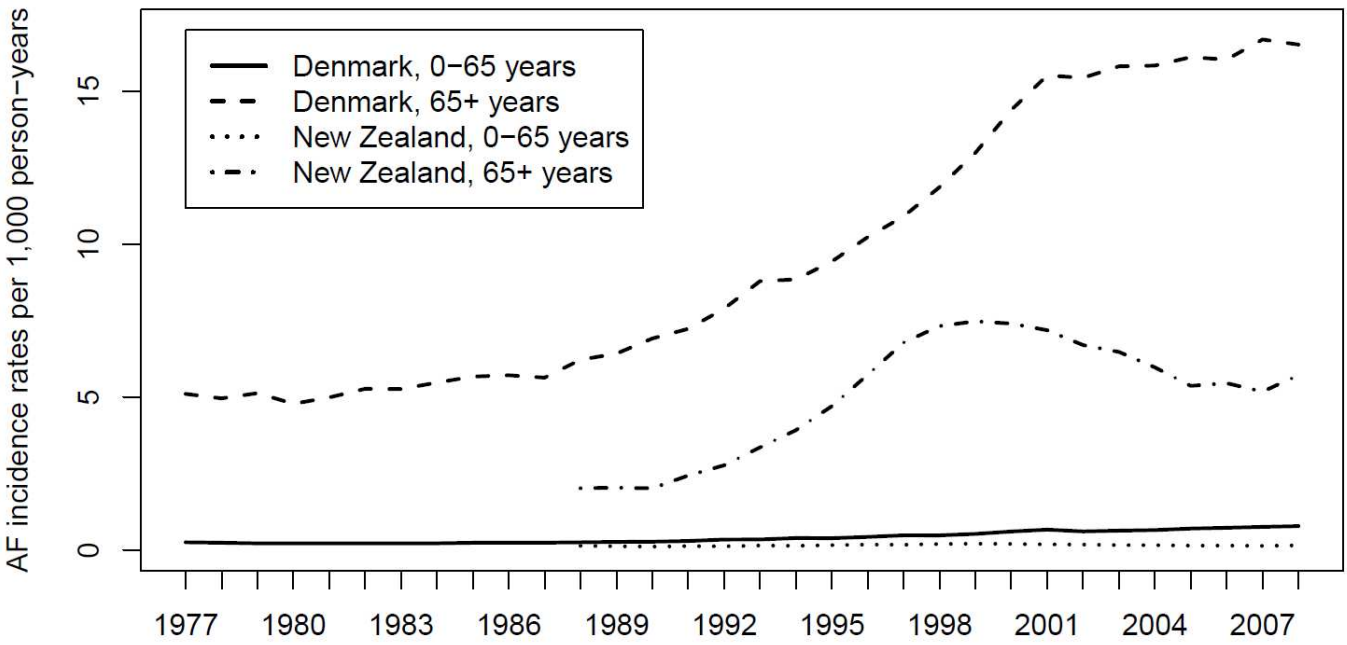

review only

Figure 2: Estimated seasonal variation in incidence rates of hospitalisations with stroke in patients with atrial fibrillation in Denmark (solid line) and New Zealand (dashed line) adjusted for overall trend. The seasonal variation is represented as the percentual deviation in incidence rates from annual median, and incidence rates are aggregated to weekly observations. Shaded bands represent 95% confidence intervals.

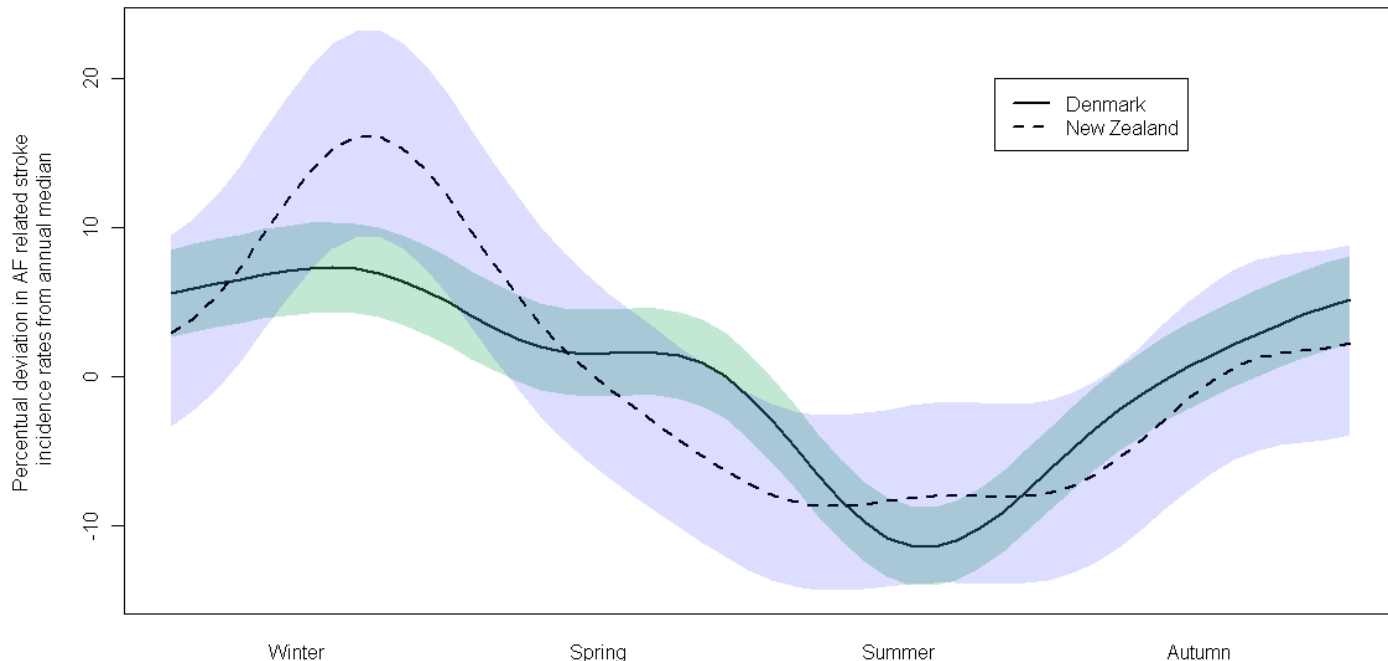

Review only

1  
2  
3  
4  
5  
6  
7  
8  
9  
10  
11  
12  
13  
14  
15  
16  
17  
18  
19  
20  
21  
22  
23  
24  
25  
26  
27  
28  
29  
30  
31  
32  
33  
34  
35  
36  
37  
38  
39  
40  
41  
42  
43  
44  
45  
46  
47  
48  
49  
50  
51  
52  
53  
54  
55  
56  
57  
58  
59  
60

Figure 3: Estimated overall trend of Danish (solid line) and New Zealand (dashed line) weekly incidence rates of hospitalisations with atrial fibrillation related stroke per 100 person-years adjusted for seasonality. Shaded bands represent 95% confidence intervals.

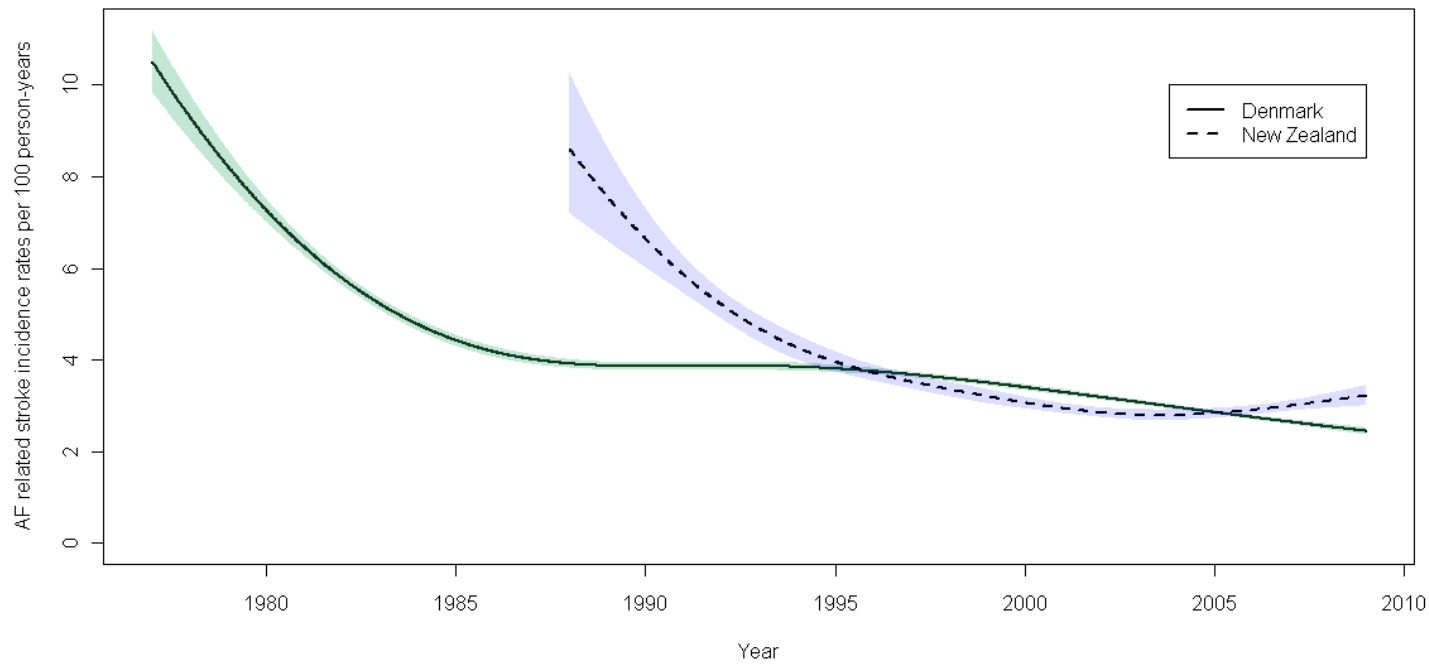

view only



Figure 4: Estimated annual 30-days case fatality risk for atrial fibrillation related stroke patients in Denmark and New Zealand

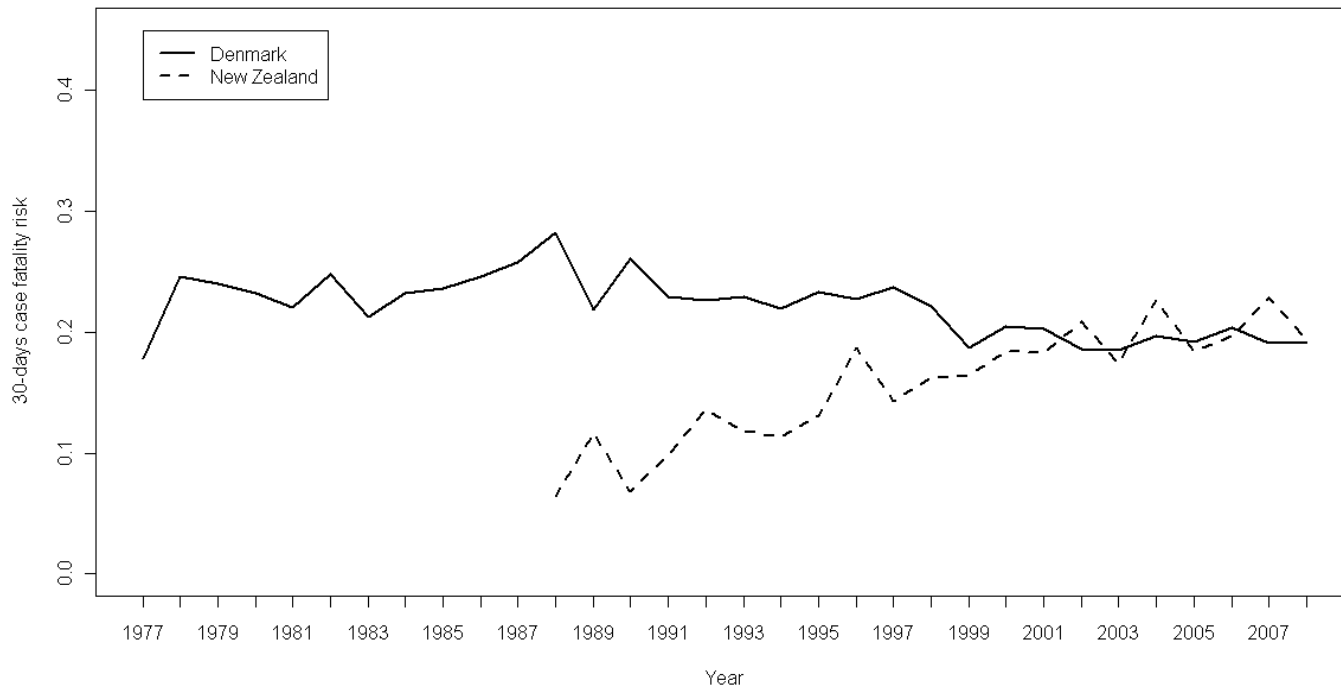

view only

STROBE Statement—Checklist of items that should be included in reports of *cohort studies*

|                              | Item No | Recommendation                                                                                                                                                                                                                                                                                                                                                                                                |
|------------------------------|---------|---------------------------------------------------------------------------------------------------------------------------------------------------------------------------------------------------------------------------------------------------------------------------------------------------------------------------------------------------------------------------------------------------------------|
| <b>Title and abstract</b>    | 1       | (a) Indicate the study's design with a commonly used term in the title or the abstract<br>(b) Provide in the abstract an informative and balanced summary of what was done and what was found                                                                                                                                                                                                                 |
| <b>Introduction</b>          |         |                                                                                                                                                                                                                                                                                                                                                                                                               |
| Background/rationale         | 2       | Explain the scientific background and rationale for the investigation being reported                                                                                                                                                                                                                                                                                                                          |
| Objectives                   | 3       | State specific objectives, including any prespecified hypotheses                                                                                                                                                                                                                                                                                                                                              |
| <b>Methods</b>               |         |                                                                                                                                                                                                                                                                                                                                                                                                               |
| Study design                 | 4       | Present key elements of study design early in the paper                                                                                                                                                                                                                                                                                                                                                       |
| Setting                      | 5       | Describe the setting, locations, and relevant dates, including periods of recruitment, exposure, follow-up, and data collection                                                                                                                                                                                                                                                                               |
| Participants                 | 6       | (a) Give the eligibility criteria, and the sources and methods of selection of participants. Describe methods of follow-up<br>(b) For matched studies, give matching criteria and number of exposed and unexposed                                                                                                                                                                                             |
| Variables                    | 7       | Clearly define all outcomes, exposures, predictors, potential confounders, and effect modifiers. Give diagnostic criteria, if applicable                                                                                                                                                                                                                                                                      |
| Data sources/<br>measurement | 8*      | For each variable of interest, give sources of data and details of methods of assessment (measurement). Describe comparability of assessment methods if there is more than one group                                                                                                                                                                                                                          |
| Bias                         | 9       | Describe any efforts to address potential sources of bias                                                                                                                                                                                                                                                                                                                                                     |
| Study size                   | 10      | Explain how the study size was arrived at                                                                                                                                                                                                                                                                                                                                                                     |
| Quantitative variables       | 11      | Explain how quantitative variables were handled in the analyses. If applicable, describe which groupings were chosen and why                                                                                                                                                                                                                                                                                  |
| Statistical methods          | 12      | (a) Describe all statistical methods, including those used to control for confounding<br>(b) Describe any methods used to examine subgroups and interactions<br>(c) Explain how missing data were addressed<br>(d) If applicable, explain how loss to follow-up was addressed<br>(e) Describe any sensitivity analyses                                                                                        |
| <b>Results</b>               |         |                                                                                                                                                                                                                                                                                                                                                                                                               |
| Participants                 | 13*     | (a) Report numbers of individuals at each stage of study—eg numbers potentially eligible, examined for eligibility, confirmed eligible, included in the study, completing follow-up, and analysed<br>(b) Give reasons for non-participation at each stage<br>(c) Consider use of a flow diagram                                                                                                               |
| Descriptive data             | 14*     | (a) Give characteristics of study participants (eg demographic, clinical, social) and information on exposures and potential confounders<br>(b) Indicate number of participants with missing data for each variable of interest<br>(c) Summarise follow-up time (eg, average and total amount)                                                                                                                |
| Outcome data                 | 15*     | Report numbers of outcome events or summary measures over time                                                                                                                                                                                                                                                                                                                                                |
| Main results                 | 16      | (a) Give unadjusted estimates and, if applicable, confounder-adjusted estimates and their precision (eg, 95% confidence interval). Make clear which confounders were adjusted for and why they were included<br>(b) Report category boundaries when continuous variables were categorized<br>(c) If relevant, consider translating estimates of relative risk into absolute risk for a meaningful time period |

|                          |    |                                                                                                                                                                            |
|--------------------------|----|----------------------------------------------------------------------------------------------------------------------------------------------------------------------------|
| Other analyses           | 17 | Report other analyses done—eg analyses of subgroups and interactions, and sensitivity analyses                                                                             |
| <b>Discussion</b>        |    |                                                                                                                                                                            |
| Key results              | 18 | Summarise key results with reference to study objectives                                                                                                                   |
| Limitations              | 19 | Discuss limitations of the study, taking into account sources of potential bias or imprecision. Discuss both direction and magnitude of any potential bias                 |
| Interpretation           | 20 | Give a cautious overall interpretation of results considering objectives, limitations, multiplicity of analyses, results from similar studies, and other relevant evidence |
| Generalisability         | 21 | Discuss the generalisability (external validity) of the study results                                                                                                      |
| <b>Other information</b> |    |                                                                                                                                                                            |
| Funding                  | 22 | Give the source of funding and the role of the funders for the present study and, if applicable, for the original study on which the present article is based              |

\*Give information separately for exposed and unexposed groups.

**Note:** An Explanation and Elaboration article discusses each checklist item and gives methodological background and published examples of transparent reporting. The STROBE checklist is best used in conjunction with this article (freely available on the Web sites of PLoS Medicine at <http://www.plosmedicine.org/>, Annals of Internal Medicine at <http://www.annals.org/>, and Epidemiology at <http://www.epidem.com/>). Information on the STROBE Initiative is available at <http://www.strobe-statement.org>.



**Seasonal variation and trend in hospital admissions for stroke in patients with atrial fibrillation in Denmark and New Zealand: analysis of hospital discharge data from 1977 to 2008**

|                                 |                                                                                                                                                                                                                                                                                                                                                                                                                                                                                                                                                                                                                                                                                                                                                                 |
|---------------------------------|-----------------------------------------------------------------------------------------------------------------------------------------------------------------------------------------------------------------------------------------------------------------------------------------------------------------------------------------------------------------------------------------------------------------------------------------------------------------------------------------------------------------------------------------------------------------------------------------------------------------------------------------------------------------------------------------------------------------------------------------------------------------|
| Journal:                        | <i>BMJ Open</i>                                                                                                                                                                                                                                                                                                                                                                                                                                                                                                                                                                                                                                                                                                                                                 |
| Manuscript ID:                  | bmjopen-2012-001210.R1                                                                                                                                                                                                                                                                                                                                                                                                                                                                                                                                                                                                                                                                                                                                          |
| Article Type:                   | Research                                                                                                                                                                                                                                                                                                                                                                                                                                                                                                                                                                                                                                                                                                                                                        |
| Date Submitted by the Author:   | 06-Jul-2012                                                                                                                                                                                                                                                                                                                                                                                                                                                                                                                                                                                                                                                                                                                                                     |
| Complete List of Authors:       | Christensen, Anette Luther; Aalborg Hospital, Aarhus University Hospital, Department of Cardiology, Aalborg AF Study Group, Center for Cardiovascular Research<br>Rasmussen, Lars Hvilsted; Aalborg Hospital, Aarhus University Hospital, Department of Cardiology, Aalborg AF Study Group, Center for Cardiovascular Research<br>Baker, Michael; Otago University, Public Health<br>Lip, Gregory; University Department of Medicine<br>Dethlefsen, Claus; Aalborg Hospital, Aarhus University Hospital, Department of Cardiology, Aalborg AF Study Group, Center for Cardiovascular Research<br>Larsen, Torben Bjerregaard; Aalborg Hospital, Aarhus University Hospital, Department of Cardiology, Aalborg AF Study Group, Center for Cardiovascular Research |
| <b>Primary Subject Heading</b>: | Cardiovascular medicine                                                                                                                                                                                                                                                                                                                                                                                                                                                                                                                                                                                                                                                                                                                                         |
| Secondary Subject Heading:      | Epidemiology, Public health                                                                                                                                                                                                                                                                                                                                                                                                                                                                                                                                                                                                                                                                                                                                     |
| Keywords:                       | Stroke < NEUROLOGY, Atrial fibrillation, Seasonal variation, EPIDEMIOLOGY, Cardiology < INTERNAL MEDICINE, Poisson regression                                                                                                                                                                                                                                                                                                                                                                                                                                                                                                                                                                                                                                   |
|                                 |                                                                                                                                                                                                                                                                                                                                                                                                                                                                                                                                                                                                                                                                                                                                                                 |

SCHOLARONE™  
Manuscripts

1  
2  
3  
4 **Seasonal variation and trend in hospital admissions for stroke in patients with atrial**  
5 **fibrillation in Denmark and New Zealand: analysis of hospital discharge data from**  
6 **1977 to 2008**  
7  
8

9  
10 Corresponding author:

11 Research Fellow Anette Luther Christensen

12 Department of Cardiology, Aalborg AF Study Group, Cardiovascular Research Center, Aalborg Hospital,

13 Aarhus University Hospital, Aalborg, Denmark

14 Aalborg Hospital Science and Innovation Center

15 Sdr. Skovvej 15

16 9000 Aalborg

17 Denmark

18 Mail: [anluc@rn.dk](mailto:anluc@rn.dk)

19 Phone: +45 9932 6885

20 Fax: +45 9932 6813  
21  
22  
23  
24

25 Head of Research Lars Hvilsted Rasmussen

26 Department of Cardiology, Aalborg AF Study Group, Cardiovascular Research Center, Aalborg Hospital,

27 Aarhus University Hospital, Aalborg, Denmark

28 Thrombosis Research Unit, Faculty of Medicine, Aalborg University, Aalborg, Denmark  
29  
30

31 Associate Professor Michael G. Baker

32 Department of Public Health, University of Otago, Wellington, New Zealand  
33  
34

35 Professor Gregory Y. H. Lip

36 University of Birmingham Centre for Cardiovascular Sciences, City Hospital, Birmingham, United

37 Kingdom  
38  
39

40 Associate Professor Claus Dethlefsen

41 Department of Cardiology, Aalborg AF Study Group, Cardiovascular Research Center, Aalborg Hospital,

42 Aarhus University Hospital, Aalborg, Denmark  
43  
44

45 Associate Professor Torben Bjerregaard Larsen

46 Department of Cardiology, Aalborg AF Study Group, Cardiovascular Research Center, Aalborg Hospital,

47 Aarhus University Hospital, Aalborg, Denmark

48 Thrombosis Research Unit, Faculty of Medicine, Aalborg University, Aalborg, Denmark  
49

50 Keywords: Stroke, Atrial fibrillation, Seasonal variation, Epidemiology, Cardiology, Poisson regression  
51

52 Word Count: 3614  
53  
54  
55  
56  
57  
58  
59  
60

**Abstract:**

Objectives: There are relatively few large studies of seasonal variation in the occurrence of stroke in patients with AF. We investigated the seasonal variation in incidence rates of hospitalizations with stroke in patients from Denmark and New Zealand.

Design: Cohort study.

Setting: Nationwide hospital discharge data from Denmark and New Zealand.

Participants: 243,381 (median age 75) subjects having a first-time hospitalization with AF in Denmark and 51,480 (median age 76) subjects in New Zealand constituted the study population. Subjects with previous hospitalization with stroke were excluded.

Primary and secondary effect measures: Peak-to-trough ratio of the seasonal variation in weekly incidence rates of stroke in AF patients adjusted for an overall trend was primary effect measure and was assessed using a log-linear Poisson regression model. Secondary effect measures were incidence rate ratios of AF and 30-days case fatality for stroke patients.

Results: Annual incidence rate ratio for AF in Denmark was 1.055% (95%CI: 1.053-1.057) for patients aged <65 and 1.050% (95%CI: 1.049-1.051) for patients aged  $\geq 65$ , whereas 1.002% (95%CI: 0.998-1.006) for patients aged <65 and 1.026% (95%CI: 1.024-1.028) for patients aged  $\geq 65$  in New Zealand. In Denmark 36,088 subjects were hospitalized with stroke, and 7,518 subjects in New Zealand, both showing peaks during winter with peak-to-trough ratios equal 1.22 and 1.27, respectively and a decreasing trend. The 30-days case fatality risk for stroke patients is now (2000-08) about 20% in both countries.

Conclusions: Although incidence rates of hospitalizations with stroke in patients with AF have decreased in recent years, this remains a common AF complication with a high case fatality risk. The marked winter peak in incidence rates of hospitalization with stroke in AF patients suggests that there are opportunities to reduce this complication. Further studies are necessary to identify how to optimize treatment of AF and prevention of stroke.

**Article Focus:**

Estimate the peak-to-trough ratio of hospitalisations with stroke in atrial fibrillation patients in a cohort study design based on discharge data from Denmark and New Zealand using a log-linear Poisson regression model.

Explore trends in incidence rates of atrial fibrillation in the entire Danish and New Zealand population.

Estimate 30-days case fatality risks for stroke in atrial fibrillation patients in Denmark and New Zealand.

**Key Messages:**

Hospitalisations with stroke in atrial fibrillation patients show similar seasonal variation with a peak during winter and trough during summer in countries in opposite hemispheres.

The incidence rates of atrial fibrillation in entire Danish and New Zealand population have increased since start of registration of hospitalisations until 2008.

The 30-days case fatality risk for stroke in atrial fibrillation patients seems to have been at a constant level during 2000-2008.

**Strengths and limitations:**

The main strength of this study is that study cohort is based on two entire national populations.

The main limitation of this study was inherent to its observational nature since the negative predictive value of discharge data may not be assessed.

The cohort study design indicates associations to be explored further to identify causality through randomised controlled studies.

## 1. Introduction

Atrial fibrillation (AF) is the most common sustained cardiac rhythm disorder, and is associated with a substantial risk of mortality and morbidity from thromboembolism and especially thromboembolic stroke. Well-established risk factors for stroke in AF patients are prior stroke, advanced age, hypertension, diabetes mellitus, moderate-severe systolic dysfunction and vascular disease [1–3].

A seasonal variation in acute presentation with various cardiovascular disorders has been reported, with data on acute presentations with myocardial infarction, sudden death, rupture/dissection of aortic aneurysms, heart failure hospitalizations and venous thromboembolism [4–9] all showing a seasonal peak during winter. Acute stroke and transient ischemic attack show a similar pattern [10,11].

In addition, a seasonal variation in paroxysmal AF has been documented by 24-hour Holter electrocardiogram, with maximum and minimum incidences in autumn and summer, respectively [12]. It has been suggested that AF hospital admissions may also exhibit a seasonal variation, with the risk being modestly higher during the winter and inversely associated with outdoor temperature [13]. Nonetheless, this effect may be small and has been considered unlikely to be significant for policy or etiological research purposes [14]. However, this may reflect the limitations of relatively small single centre studies, and large “real world” population-based analyses may be needed. Indeed, using the linked Scottish Morbidity Record scheme between 1990 and 1996, there was a total of 33,582 male and 34,463 female AF hospitalizations, which showed a substantial seasonal variation in AF hospitalizations and deaths, particularly in the elderly [15].

Few studies exist on seasonal variation in occurrences of stroke and mortality risk after stroke in patients with AF. One analysis from the Danish National Registry of Patients has previously found a seasonal variation in stroke occurrence in patients with non-valvular AF but no effect of season on mortality after stroke [16]. One small series of approximately 300 Greek patients with first-ever cardio embolic acute stroke due to AF also revealed a seasonal peak during winter and a decline of stroke occurrence during summer [17].

Assuming a seasonal variation in hospital admissions with stroke in patients with AF, we would expect to see similar temporal patterns in countries from different parts of the world. However, we are unaware of any data comparing seasonal changes over a comparable time period between two countries, irrespective of seasonality shift by being in the northern or southern hemisphere. In this study we described the occurrences of hospitalizations with stroke in patients with AF, including estimating the seasonal variation in the two countries investigating the temporal patterns from the northern and southern hemisphere. Furthermore, we described the overall trend in incidence rates of hospitalization admissions for both AF and stroke in patients with AF over a twenty year period. Differences in annual 30-days case fatality risks between countries were also assessed.



## 2. Material and methods

### 2.1 Study Period and Study Population

The study period in Denmark was from 1 January 1977 and in New Zealand from 1 January 1988, both to 31 December 2008. Hospitalisations with first time non-valvular AF and stroke were recorded using the International Classification of Diseases (ICD). Both principal and additional diagnoses were included for analysis. No discrimination was made between ischemic or hemorrhagic strokes.

The Danish cohort was identified in the Danish National Registry of Patients, starting in 1977, using the Danish Personal Identification number. This is a unique and national identification number which is part of the personal information stored in the Civil Registration System. The Danish study population in the present study included Danish residents who developed incident AF from 1977 to 2008. ICD codes were used to extract admissions for AF. The 8th revision (ICD-8) was used until 1994, and after 1994 the 10th revision (ICD-10) was used. AF and atrial flutter were coded separately in ICD-8 (codes 427.93 and 427.94), whereas in ICD-10, AF and atrial flutter have a single ICD code (I48). Therefore, atrial flutter cases have also been included in the present study. In Denmark, incidences of stroke were found in the Danish National Registry of Patients, using ICD-8 (433, 434, and 436) and ICD-10 (I63, I64). To avoid including prevalent cases of both AF and stroke in AF patients, identified cases before 1980 were excluded from the analyses for the Danish cohort.

The cohort from New Zealand was identified from 1988 to 2008, using the National Minimum Dataset. The National Minimum Dataset, managed by the New Zealand Ministry of Health, holds information on all publicly funded hospitalizations in New Zealand. Each hospitalization is linked with the patient's National Health Index (NHI) number, which is a unique number provided to each person using health and disability support services in New Zealand. This index is stored in the NHI database along with demographic details of the person. In the National Minimum Dataset ICD 9th revision (ICD-9) was used until June 1999, and after that ICD-10 was used. Similar to the Danish data, AF and atrial flutter were coded separately in ICD-9 (codes 427.31 and 427.32), whereas in ICD-10, AF and atrial flutter have a single ICD code (I48). In New Zealand, incidences of stroke were found in the National Minimum Dataset using ICD-9 (433, 434, 436) and ICD-10 (I63, I64). To avoid including prevalent cases of both AF and stroke in AF patients, identified cases before 1991 were excluded from the analyses for the New Zealand cohort.

In Denmark annual population figures were obtained from Statistics Denmark, whereas in New Zealand only five-year population figures were available from Statistics New Zealand starting from 1996. Annual estimates for the New Zealand population from 1988 to 2008 were obtained by linear inter- and extrapolation.

Comorbidities were assessed by identifying hospitalizations with either congestive heart failure (ICD8: 427.09, 428, ICD9: 428, ICD10: I11.09, I50), hypertension (ICD8: 400-404, ICD9: 401-405, ICD10: I10-I13, I15),

1  
2  
3 diabetes (ICD8: 249, 250, ICD9: 250, ICD10: E11, E14), acute myocardial infarction (ICD8: 410, ICD9: 410,  
4 ICD10: I21, I22), peripheral artery disease (ICD8: 440.2, 443, 444, ICD9: 440, 443, 444, ICD10: I70.2, I73.9,  
5 I74.5), or coronary artery disease (ICD8: 412, ICD9: 414, ICD10: I25.1). One subject may have more than one  
6 comorbidity.  
7  
8  
9

## 10 2.2 Statistical analysis

11  
12 We define three effect measures for analyses. First, incidence rates of AF, defined as the annual number of  
13 hospitalizations with AF divided by the annual population size. Second, weekly incidence rates of stroke in AF  
14 patients defined as the weekly number of first time hospitalizations with stroke having previous hospital admissions  
15 for AF divided by the weekly person-time at risk i.e. for a given week the number of AF patients with no previous  
16 stroke. Third, 30-days case fatality risk, defined as the annual number of death among stroke patients having AF  
17 divided by the annual number of stroke patients having AF.  
18  
19  
20  
21  
22

23  
24 A log-linear Poisson regression model was fitted to incidence rates of AF, adjusting for a linear trend and modeling  
25 an interaction between trend and country. The analysis was stratified on age groups (<65 and  $\geq 65$  years of age).  
26 Only annual incidence rates from 1991 to 2008 were analyzed.  
27  
28

29  
30 A log-linear Poisson regression model was fitted to weekly incidence rates of stroke in AF patients adjusted for a  
31 non-linear trend and a seasonal variation component. The seasonal variation component was specified as a sum of  
32 four sinusoids with frequencies one to four [18]. The overall trend was specified as a restricted cubic spline with  
33 five knots [19]. As a measurement of the seasonal variation we estimated the peak-to-trough ratio, which is an  
34 incidence rate ratio.  
35  
36  
37

38  
39 A logit-linear logistic regression model was fitted to 30-days case fatality risks, adjusting for a linear trend and  
40 modeling an interaction between trend and country.  
41

42  
43 Assessments of statistically significant interaction between trend and countries were performed by a likelihood  
44 ratio test. Tests for overdispersion of Poisson models and goodness of fit, including tests for all models were  
45 performed.  
46  
47

48  
49 P-values less than 5% were considered statistically significant. All analyses were performed in R version 2.15.1  
50 [20] using the package `Peak2Trough` [21].  
51

## 52 3. Results

53  
54  
55 Demographic descriptions of the two cohorts are found in Table 1. For the Danish cohort, we identified 243,381  
56 incident hospitalizations with AF for the 29-year period from 1980 to 2008, of which 48% were females. For the  
57 New Zealand cohort 51,480 similar subjects were identified for the 18-year period from 1991 to 2008 (48%  
58  
59  
60

1  
2  
3 females). The median age at time of AF in the Danish cohort was 75.2 years, which was similar to the New  
4 Zealand cohort (75.8 years).  
5  
6

7  
8 The distribution of diagnosis type differed in the two cohorts (Table 1). In both cohorts more than half of AF  
9 diagnoses were given as a supplementary diagnosis to a principal diagnosis, with a higher proportion in New  
10 Zealand, than in Denmark. The median weekly count of AF hospitalizations in Denmark was 142, whereas in New  
11 Zealand the weekly count was 53. There was no significant sex difference in weekly counts between the cohorts.  
12  
13

14  
15 Differences in comorbidities were apparent between Denmark and New Zealand. In Table 2, characteristics of  
16 comorbidities for all AF patients are given. In general, comorbidities were more present in the New Zealand cohort  
17 compared with the Danish cohort except for diabetes.  
18  
19

20  
21 Annual incidence rates of AF hospitalizations in Denmark and New Zealand are shown in Figure 1. For both  
22 countries, the incidence rates for patients younger than 65 years of age were markedly lower than for patients above  
23 65 years of age. A likelihood ratio test indicates a significant interaction between trend and country, i.e. difference  
24 in increase over time in incidence rates between countries, for both age groups (both p-values less than 0.001). In  
25 Denmark, the incidence rates increased by 5.0% annually (95% CI: 4.9-5.1%) for patients above 65 years of age  
26 compared with only an increase of 2.6% annually (95% CI: 2.4-2.8%) for the same patients in New Zealand. For  
27 the younger patients the incidence rates increased by 5.4% annually (95% CI: 5.3-5.7%) in Denmark and 0.2%  
28 (95% CI: -0.2-0.58%) in New Zealand.  
29  
30  
31  
32  
33

34  
35 During follow-up 36,088 subjects were hospitalized with stroke (55.1% females) in the Danish cohort. In New  
36 Zealand the figures were 7,518 (54.6% females). The median weekly count of stroke in Denmark was 22 and 7 in  
37 New Zealand. Table 3 shows further follow-up characteristics of the two cohorts.  
38  
39

40  
41 The seasonal variations for both countries estimated by fitting the Poisson regression model and adjusted for an  
42 overall trend are shown in Figure 2. Time for seasonal peak in both countries was winter and time for seasonal  
43 trough was summer. The peak-to-trough ratio in Denmark was 1.22, i.e. the risk of being hospitalized with stroke in  
44 AF patients at peak time in winter is 22% higher compared to summer. In New Zealand the peak-to-trough ratio  
45 was 1.27.  
46  
47

48  
49 Weekly incidence rates of hospitalizations with stroke in AF patients were overall decreasing in both countries  
50 during the study period; see Figure 3 which shows the estimated trends. From 1985 to the end of study period the  
51 incidence rates in Denmark decreased markedly reaching a plateau of approximately 3.5 hospitalizations per 100  
52 person-years during the period from the mid 1990s to 2000, followed by a further decline. Similarly in New  
53 Zealand the incidence rates decrease markedly during the first 14 years from 1991 to 2004.  
54  
55  
56  
57  
58  
59  
60

1  
2  
3  
4  
5  
6  
7  
8  
9  
10  
11  
12  
13  
The 30-days case fatality risks for Denmark and New Zealand are shown in Figure 4. The analysis indicated that the odds ratio for death within 30 days after stroke in AF patients decreased by 1.1% (95% CI: 0.83-1.4%) annually in Denmark. By contrast the odds ratio increased by 0.87% (95% CI: -0.31-2.07%) annually in New Zealand. A likelihood ratio test indicated strong evidence in favor of interaction between trend and country ( $p=0.002$ ). Overall, the 30-days case fatality risk converged in both countries towards a value of about 20% during the most recent period.

14  
15  
16  
17  
All models were assessed for overdispersion and revealed no indication of such.

#### 18 19 20 21 22 23 24 25 26 27 28 29 30 31 32 33 34 35 36 37 38 39 40 41 42 43 44 45 46 47 48 49 50 51 52 53 54 55 56 57 58 59 60

**4. Discussion**

This study shows that stroke remains a common complication of AF. Stroke in AF patients is serious with a 20% 30-days case fatality risk in recent years (2000-08). This study found evidence of a marked seasonal variation in incidence rates of hospitalizations with stroke in AF patients, with a peak in winter and a trough in summer in both countries. The analysis indicated a difference in overall trend in incidence rates of hospitalizations with stroke in AF patients between countries, Denmark tending to have lower incidence rates, compared to New Zealand. In contrast, we showed a highly significant increase in incidence rates of AF over time in both countries. Furthermore, we found differences in the type of diagnoses in the two countries.

The main limitation of this study was inherent to its observational nature. Even though the positive predictive value of the diagnosis of AF is very high in the Danish registry (93%) [22,23], the negative predictive value of such data sources is harder to assess. Consequently, studies based on hospital discharge registries may be affected by misclassification and inclusion bias - for example, by including only patients admitted to hospital with AF we might have increased the proportion of patients who were at higher risk of thromboembolic events and death. The incidence of stroke was defined by the Danish National Registry of Patients, and not all stroke diagnoses were defined by cerebral imaging. The diagnosis of stroke has previously been validated in the Danish registry; with a positive predictive value of ischemic stroke of 97% [24]. Also, we are limited by the inability to differentiate between ischemic and hemorrhagic strokes, but from a Danish stroke registry we know that stroke in patients with AF is predominantly embolic [25]. Stroke in AF patients by definition requires hospitalization and recorded diagnosis for two separate conditions, so trends in incidence rates are determined by factors that affect both of these events and may be complex to interpret. Misclassification or under-reporting of comorbidities, especially hypertension and diabetes, may have occurred [26], and we did not have data on the nature of AF in any of the cohorts. No data exist on the validity of diagnoses on AF and stroke from the National Minimum Dataset in New Zealand. Our study included patients from Denmark and New Zealand, who were treated in different settings and probably with different methods. However, the range of patients was similar regarding age and co-morbid conditions. The nature of exposures was comparable, and the definitions of outcomes were all defined by comparable ICD-coding in the two countries. The differences in health care systems in the two countries can hardly

1  
2  
3 influence the referral pattern around AF. Furthermore, comparison of the two countries brings forward interesting  
4 questions when we compare with similar but smaller studies from other countries.  
5  
6

7  
8 Consistent with another study we showed that the seasonal variation in incidence rates of hospitalizations stroke in  
9 AF patients in both countries was characterized by a peak in winter and trough in summer [16]. This pattern is  
10 reported for several other cardiovascular diseases [4–12,15,17]. The previously reported peak-to-trough ratio from  
11 Denmark of 1.11 and pattern of seasonality [16] are similar to the results reported in this study, however the peak-  
12 to-trough ratio is slightly lower. This may be due to the difference in resolution of data. In the present study weekly  
13 incidence rates were analyzed as opposed to monthly incidence rates in Frost et al [16]. The finding that the  
14 characteristics of the seasonal variation in both countries are similar may be important in the search for identifying  
15 underlying risk factors causing stroke in AF patients. Such factors may be climate factors, e.g. temperature,  
16 humidity and hours of sunshine, as well as seasonal variation in occurrences of risk factors for both AF and stroke,  
17 e.g. hypertension [27,28] and infectious diseases [29]. The difference in peak-to-trough ratio between two  
18 countries, may also lead to the identification of causes that may explain the seasonality, by considering differences  
19 between the two countries, for instance climatic differences, housing conditions, and life style patterns [30,31].  
20  
21  
22  
23  
24  
25  
26  
27

28 The overall trend in weekly incidence rates of hospitalizations with stroke in AF patients in Denmark found in this  
29 study show a markedly decrease from late 1980s. During the late eighties and early nineties several studies  
30 regarding AF and its potential increasing risk of stroke were published [32,33], which led to introduction of oral  
31 anticoagulant treatment [34,35]. This concurrence reveals the prophylactic effects of anticoagulant treatment,  
32 preventing AF patients to develop stroke. However, the overall trend in incidence rates of stroke in AF patients in  
33 New Zealand indicates that the awareness of AF and its consequences was not as present until the early nineties.  
34 Furthermore, this study indicates that the trend in incidence rates in Denmark is decreasing further towards the end  
35 of the study period, whereas in New Zealand the trend seems to increase.  
36  
37  
38  
39  
40  
41

42 The risk of stroke is multi-factorial, and is affected by risk factors such as history of hypertension, current smoking,  
43 diet, physical activity, diabetes mellitus, alcohol intake, psychosocial stress and depression, cardiac causes (e.g.  
44 AF), and ratio of apolipoproteins B to A1 [36]. Indeed, greater awareness of some risk factors e.g. blood pressure  
45 control and smoking cessation may have contributed to a lowering of hospitalizations with stroke in AF patients  
46 over this period. Also, a managed care approach to high risk patients (e.g. recent transient ischemic attack) may  
47 have led to the reduction in stroke hospitalizations in more recent years [37]. This is clearly a positive observation,  
48 given that stroke in AF patients are associated with a higher mortality, as well as a greater morbidity and disability.  
49  
50  
51  
52  
53

54 Whilst the annual incidence rates of hospitalizations with AF were lower in New Zealand compared with Denmark  
55 for both age groups there was still a highly significant increase over time in incidence rates for both countries and  
56 both age groups. This is consistent with reported increasing trends in hospitalization for AF in the United States,  
57 between 1985 and 1999 [38]. In the analysis by Wattigney et al, US hospitalizations for AF increased dramatically  
58  
59  
60

1  
2  
3 (2- to 3-fold) in the period 1985-1999. In their study, women were hospitalized with AF more often than men on an  
4 annual basis, although the age-standardized prevalence of hospitalizations was greater in men than women. Women  
5 hospitalized with AF tended to be older than men, which our results confirm.  
6  
7

8  
9 Unsurprisingly we found the median age of both Danish and New Zealand cohorts to be similar (approximately 75  
10 years). The incidence rates for patients younger than 65 years of age were much lower than for patients above 65  
11 years of age. Indeed, these observations are consistent with other epidemiological data including analyses of  
12 hospitalization data [22,38–40]. There was no significant sex difference in weekly counts in either cohort. Of note,  
13 the median weekly count of AF hospitalizations and stroke in AF patients in Denmark were higher than in New  
14 Zealand. The reasons for this remain uncertain, but may reflect the different demographic profile, differences in  
15 referral patterns and awareness of the disease as well as differences in associated comorbidities. Taking into  
16 account the variation in distribution of types of diagnoses of AF, where in New Zealand nearly 70% of the AF  
17 diagnoses were in addition to another principal diagnosis, compared with nearly 60% in Denmark, the difference in  
18 incidence rates of hospitalizations with AF may be due to differences in the health system in the two countries. In  
19 Denmark the health system is funded by taxes, and all contacts with the health system are free of charge for the  
20 patient. By contrast, in New Zealand only parts of the health system are fully funded by taxes, notably hospital  
21 care, whereas visits to the general practitioner are subject to a small user charge. Given the unspecific symptoms of  
22 AF, patients might be less likely to contact their general practitioner when experiencing symptoms with  
23 palpitations and shortness of breath. This is supported by the fact that AF patients with stroke often have non-  
24 recognized AF [41]. Consequently, a larger proportion of the New Zealand population may be undiagnosed with  
25 AF than in Denmark.  
26  
27

28  
29 In the present study, we found some differences in comorbidities (Table 2). Despite the similar age distribution  
30 between countries, especially congestive heart failure was more frequent in the New Zealand cohort and diabetes  
31 more frequent in the Danish cohort. This difference may reflect the fact that additional diagnoses for AF are used  
32 more frequently in the New Zealand cohort than in the Danish, and may be a random finding in patients referred  
33 with symptoms of congestive heart failure.  
34  
35

36  
37 This study found that there was a minor decrease in the 30-days case fatality risk for stroke in AF patients during  
38 the study period in Denmark, but an increase in New Zealand. Our findings indicate that the 30-days case fatality  
39 risk in Denmark was higher than in New Zealand until the late nineties, whereas afterwards the difference does not  
40 seem evident. This may be due to differences in anticoagulant treatments between the two countries but this also  
41 remains tentative.  
42  
43  
44  
45

## 46 47 48 49 50 51 52 53 54 55 56 **5. Conclusion** 57 58 59 60

1  
2  
3 This is the first concurrent analysis of the epidemiology of stroke in AF patients in nationwide population data  
4 from two western countries, one in the northern hemisphere and one in the southern hemisphere. We showed that  
5 the incidence rates of hospitalization with stroke in AF patients exhibit a marked seasonal variation in both  
6 countries, which is characterized by a peak in winter and a trough in summer. Both countries have also shown a  
7 downward trend in hospitalizations with stroke in AF patients, despite a pronounced increase in AF  
8 hospitalizations. This trend, seasonal variation and differences in comorbidities and distribution of types of  
9 diagnoses between the two countries, merit further study. Such research could help us better understand the clinical  
10 epidemiology and public health impact of AF and its complications and identify opportunities for better prevention  
11 of AF and stroke.  
12  
13  
14  
15  
16  
17  
18  
19  
20  
21  
22  
23  
24  
25  
26  
27  
28  
29  
30  
31  
32  
33  
34  
35  
36  
37  
38  
39  
40  
41  
42  
43  
44  
45  
46  
47  
48  
49  
50  
51  
52  
53  
54  
55  
56  
57  
58  
59  
60

## References

- 1 Atrial Fibrillation Working Group. Independent predictors of stroke in patients with atrial fibrillation: a systematic review. *Neurology* 2007;**69**:546–554.
- 2 Hughes M, Lip GYH. Stroke and thromboembolism in atrial fibrillation: a systematic review of stroke risk factors, risk stratification schema and cost effectiveness data. *Thromb Haemostasis* 2008;**99**:295–304.
- 3 Rasmussen LH, Larsen TB, Due KM, *et al.* Impact of vascular disease in predicting stroke and death in patients with atrial fibrillation: the Danish Diet, Cancer and Health cohort study. *J Thromb Haemostasis* 2011;**9**:1301–1307.
- 4 Spencer FA, Goldberg RJ, Becker RC, *et al.* Seasonal distribution of acute myocardial infarction in the second National Registry of Myocardial Infarction. *J Am Coll Cardiol* 1998;**31**:1226–1233.
- 5 Manfredini R, Manfredini F, Boari B, *et al.* Seasonal and weekly patterns of hospital admissions for nonfatal and fatal myocardial infarction. *Am J Emerg Med* 2009;**27**:1097–1103.
- 6 Arntz HR, Willich SN, Schreiber C, *et al.* Diurnal, weekly and seasonal variation of sudden death. Population-based analysis of 24,061 consecutive cases. *Eur Heart J* 2000;**21**:315–320.
- 7 Mehta RH, Manfredini R, Hassan F, *et al.* Chronobiological Patterns of Acute Aortic Dissection. *Circulation* 2002;**106**:1110–1115.
- 8 Gallerani M, Boari B, Smolensky MH, *et al.* Seasonal variation in occurrence of pulmonary embolism: analysis of the database of the Emilia-Romagna region, Italy. *Chronobiol Int J Biol Med Rhythm Res* 2007;**24**:143–160.
- 9 Gallerani M, Boari B, Manfredini F, *et al.* Seasonal variation in heart failure hospitalization. *Clin Cardiol* 2011;**34**:389–394.
- 10 Manfredini R, Gallerani M, Portaluppi F, *et al.* Chronobiological Patterns of Onset of Acute Cerebrovascular Diseases. *Thromb Res* 1997;**88**:451–463.
- 11 Manfredini R, Manfredini F, Boari B, *et al.* Temporal patterns of hospital admissions for transient ischemic attack: a retrospective population-based study in the Emilia-Romagna region of Italy. *Clin Appl Thromb Hemost* 2010;**16**:153–160.
- 12 Watanabe E, Kuno Y, Takasuga H, *et al.* Seasonal variation in paroxysmal atrial fibrillation documented by 24-hour Holter electrocardiogram. *Heart Rhythm* 2007;**4**:27–31.
- 13 Frost L, Johnsen SP, Pedersen L, *et al.* Seasonal Variation in Hospital Discharge Diagnosis of Atrial Fibrillation: A Population-Based Study. *Epidemiology* 2002;**13**:211–215.
- 14 Upshur REG, Moineddin R, Crighton EJ, *et al.* Is there a clinically significant seasonal component to hospital admissions for atrial fibrillation? *BMC Health Serv Res* 2004;**4**:5.
- 15 Murphy NF, Stewart S, MacIntyre K, *et al.* Seasonal variation in morbidity and mortality related to atrial fibrillation. *Int J Cardiol* 2004;**97**:283–288.



- 1  
2  
3  
4 16 Frost L, Vukelic Andersen L, Mortensen LS, *et al.* Seasonal variation in stroke and stroke-associated mortality in patients with a hospital diagnosis of nonvalvular atrial fibrillation or flutter. A population-based study in Denmark. *Neuroepidemiology* 2006;**26**:220–225.
- 7  
8 17 Spengos K, Vemmos K, Tsivgoulis G, *et al.* Diurnal and seasonal variation of stroke incidence in patients with cardioembolic stroke due to atrial fibrillation. *Neuroepidemiology* 2003;**22**:204–210.
- 11  
12 18 Fischer T, Lundbye-Christensen S, Johnsen SP, *et al.* Secular trends and seasonality in first-time hospitalization for acute myocardial infarction - a Danish population-based study. *Int J Cardiol* 2004;**97**:425–431.
- 15  
16 19 Harrell FE. *Regression Modelling Strategies - with Applications to Linear Models, Logistic regression and Survival Analysis*. 1st ed. Springer 2001.
- 18  
19 20 R Development Core Team. R: A Language and Environment for Statistical Computing. 2010.
- 21  
22 21 Christensen AL. Peak2Trough: Estimation of the peak-to-trough ratio of a seasonal variation component. R-package version 1.2. 2011.
- 23  
24 22 Frost L, Andersen LV, Vestergaard P, *et al.* Trend in mortality after stroke with atrial fibrillation. *Am J Med* 2007;**120**:47–53.
- 26  
27 23 Rix TA, Riahi S, Overvad K, *et al.* Validity of the diagnoses atrial fibrillation and atrial flutter in a Danish patient registry. *Scand Cardiovasc J* 2012;**46**:149-153.
- 29  
30 24 Krarup L-H, Boysen G, Janjua H, *et al.* Validity of stroke diagnoses in a National Register of Patients. *Neuroepidemiology* 2007;**28**:150–154.
- 32  
33 25 Jørgensen HS, Plesner A-M, Hübbe P, *et al.* Marked Increase of Stroke Incidence in Men Between 1972 and 1990 in Frederiksberg, Denmark. *Stroke* 1992;**23**:1701–1704.
- 35  
36 26 Chen F, Florkowski CM, Dever M, *et al.* Death Certification and New Zealand Health Information Service (NZHIS) statistics for diabetes mellitus: an under-recognised health problem. *Diabetes Res Clin Pract* 2004;**63**:113–118.
- 38  
39 27 Brennan PJ, Greenberg G, Miall WE, *et al.* Seasonal variation in arterial blood pressure. *Br Med J* 1982;**285**:919–923.
- 41  
42 28 Kochar MS, Ristow S, Kalbfleisch JH. Effect of seasonal temperature change on blood pressure in a treated hypertensive population. *J Clin Hypertens* 1985;**1**:49–52.
- 44  
45 29 Fisman DN. Seasonality of infectious diseases. *Annual Review of Public Health* 2007;**28**:127–143.
- 47  
48 30 Howden-Chapman P, Crane J, Chapman R, *et al.* Improving health and energy efficiency through community-based housing interventions. *Int J Public Health* 2011;**56**:583–588.
- 50  
51 31 Hales S, Blakely T, Foster RH, *et al.* Seasonal patterns of mortality in relation to social factors. *J Epidemiol Community* 2012;**66**:379-384.
- 53  
54 32 Petersen P, Godtfredsen J. Embolic complications in paroxysmal atrial fibrillation. *Stroke* 1986;**17**:622–626.
- 56  
57  
58  
59  
60

- 1  
2  
3  
4 33 Atrial Fibrillation Investigators. Risk factors for stroke and efficacy of antithrombotic therapy in  
5 atrial fibrillation. Analysis of pooled data from five randomized controlled trials. *Arch Intern Med*  
6 1994;**154**:1449–1457.  
7  
8 34 Stroke Prevention. Warfarin versus aspirin for prevention of thromboembolism in atrial fibrillation:  
9 Stroke Prevention in Atrial Fibrillation II Study. *Lancet* 1994;**343**:687–691.  
10  
11 35 Frost L, Engholm G, Møller H, *et al*. Decrease in mortality in patients with a hospital diagnosis of  
12 atrial fibrillation in Denmark during the period 1980-1993. *Eur Heart J* 1999;**20**:1592–1599.  
13  
14 36 O'Donnell MJ, Xavier D, Liu L, *et al*. Risk factors for ischaemic and intracerebral haemorrhagic  
15 stroke in 22 countries (the INTERSTROKE study): a case-control study. *Lancet* 2010;**376**:112–  
16 123.  
17  
18 37 Rothwell PM, Algra A, Amarenco P. Medical treatment in acute and long-term secondary  
19 prevention after transient ischaemic attack and ischaemic stroke. *Lancet* 2011;**377**:1681–1692.  
20  
21 38 Wattigney WA, Mensah GA, Croft JB. Increasing trends in hospitalization for atrial fibrillation in  
22 the United States, 1985 through 1999: implications for primary prevention. *Circulation*  
23 2003;**108**:711–716.  
24  
25 39 Stewart S, MacIntyre K, MacLeod MM, *et al*. Trends in hospital activity, morbidity and case  
26 fatality related to atrial fibrillation in Scotland, 1986-1996. *Eur Heart J* 2001;**22**:693–701.  
27  
28 40 Humphries KH, Jackevicius C, Gong Y, *et al*. Population rates of hospitalization for atrial  
29 fibrillation/flutter in Canada. *Can J Cardiol* 2004;**20**:869–876.  
30  
31 41 Lip GYH. Stroke in atrial fibrillation: epidemiology and thromboprophylaxis. *J Thromb*  
32 *Haemostasis* 2011;**9**:344–251.  
33  
34  
35  
36  
37  
38  
39  
40  
41  
42  
43  
44  
45  
46  
47  
48  
49  
50  
51  
52  
53  
54  
55  
56  
57  
58  
59  
60

Table 1: Demographic description of patients with atrial fibrillation in Denmark and New Zealand

|                                    | Total   |             | Women   |             | Men     |             |
|------------------------------------|---------|-------------|---------|-------------|---------|-------------|
| <b>Denmark</b>                     |         |             |         |             |         |             |
| Number of AF                       | 243,381 | (100%)      | 116,395 | (47.8%)     | 126,986 | (52.2%)     |
| Age at AF, years<br>(median (IQR)) | 75.2    | (70.7-84.6) | 78.4    | (62.4-79.5) | 71.9    | (62.4-79.5) |
| AF                                 |         |             |         |             |         |             |
| 427.31 (ICD-8)                     | 75,739  | (31.1%)     | 37,680  | (32.4%)     | 38,059  | (30.0%)     |
| 427.32 (ICD-8)                     | 7,050   | (2.9%)      | 2,834   | (2.4%)      | 4,216   | (3.3%)      |
| I48 (ICD-10)                       | 160,592 | (66.0%)     | 75,81   | (65.2%)     | 84,711  | (66.7%)     |
| Diagnosis type                     |         |             |         |             |         |             |
| Principal                          | 103,846 | (42.7%)     | 47,585  | (40.9%)     | 56,261  | (44.3%)     |
| Additional                         | 139,535 | (57.3%)     | 68,810  | (59.1%)     | 70,725  | (55.7%)     |
| Weekly counts<br>(median (IQR))    | 142     | (99-211)    | 69      | (48-99)     | 74      | (50-112)    |
| <b>New Zealand</b>                 |         |             |         |             |         |             |
| Number of AF                       | 51,480  | (100%)      | 24,883  | (48.3%)     | 26,597  | (51.7%)     |
| Age at AF, years<br>(median (IQR)) | 75.8    | (70.4-84.3) | 78.1    | (65.0-80.3) | 73.6    | (65.0-80.3) |
| AF                                 |         |             |         |             |         |             |
| 427.93 (ICD-9)                     | 17,705  | (34.4%)     | 8,682   | (34.9%)     | 9,023   | (33.9%)     |
| 427.94 (ICD-9)                     | 1,389   | (2.7%)      | 515     | (2.1%)      | 874     | (3.3%)      |
| I48 (ICD-10)                       | 32,386  | (62.9%)     | 15,686  | (63.0%)     | 16,700  | (62.8%)     |
| Diagnosis type                     |         |             |         |             |         |             |
| Principal                          | 15,501  | (30.1%)     | 7,810   | (31.4%)     | 7,692   | (28.9%)     |
| Additional                         | 35,978  | (69.9%)     | 17,073  | (68.6%)     | 18,905  | (71.1%)     |
| Weekly counts<br>(median (IQR))    | 53      | (41-63)     | 25      | (19-31)     | 27      | (21-33)     |

AF: Atrial fibrillation, ICD: International Classification of Diseases, IQR: Inter quartile range

Table 2: Comorbidities and age distribution among patients hospitalized with atrial fibrillation having at least one comorbid disorder in Denmark and New Zealand

|                                                                          | Denmark | New Zealand |
|--------------------------------------------------------------------------|---------|-------------|
| <b>Characteristics</b>                                                   |         |             |
| Percentage of all patients with AF having at least one comorbid disorder | 32.5    | 53.3        |
| Age, years (at time of AF)                                               |         |             |
| Age $\geq$ 75 years                                                      | 50.7    | 52.8        |
| Age 65-74                                                                | 26.6    | 27.1        |
| Women                                                                    | 47.8    | 48.3        |
| Congestive heart failure                                                 | 9.6     | 28.4        |
| Hypertension                                                             | 11.5    | 11.9        |
| Diabetes                                                                 | 6.2     | 4.4         |
| Acute myocardial infarction                                              | 10.3    | 15.5        |
| Peripheral arterial disease                                              | 3.5     | 5.8         |
| Coronary artery disease                                                  | 11.2    | 16.8        |

The comorbid conditions were registered if they preceded an incident diagnosis of AF.

Data are percentages.

Table 3: Demographic description of patients with stroke having atrial fibrillation in Denmark and New Zealand

|                                     | Total  |             | Women  |             | Men    |             |
|-------------------------------------|--------|-------------|--------|-------------|--------|-------------|
| <b>Denmark</b>                      |        |             |        |             |        |             |
| Number of strokes                   | 36,088 | (100%)      | 19,872 | (55%)       | 16,216 | (45%)       |
| Age at stroke, years (median (IQR)) | 79.5   | (76.0-86.4) | 81.6   | (69.8-82.4) | 76.7   | (69.8-82.4) |
| Stroke                              |        |             |        |             |        |             |
| 433 (ICD-8)                         | 2,452  | (6.8%)      | 1,279  | (6.4%)      | 1,173  | (7.2%)      |
| 434 (ICD-8)                         | 1,139  | (3.2%)      | 556    | (2.8%)      | 583    | (3.6%)      |
| 436 (ICD-8)                         | 8,274  | (22.9%)     | 4,730  | (23.8%)     | 3,544  | (21.9%)     |
| I63 (ICD-10)                        | 9,771  | (27.1%)     | 5,262  | (26.5%)     | 4,509  | (27.8%)     |
| I64 (ICD-10)                        | 14,452 | (40.0%)     | 8,045  | (40.5%)     | 6,407  | (39.5%)     |
| Diagnosis type                      |        |             |        |             |        |             |
| Principal                           | 27,094 | (75.1%)     | 15,110 | (76.0%)     | 11,984 | (73.9%)     |
| Additional                          | 8,994  | (24.9%)     | 4,762  | (24.0%)     | 4,232  | (26.1%)     |
| Weekly counts (median (IQR))        | 22     | (14-31)     | 12     | (8-17)      | 10     | (6-14)      |
| Time to stroke, days (median (IQR)) | 380    | (0-1572)    | 365    | (0-1528)    | 397    | (0-1634)    |
| <b>New Zealand</b>                  |        |             |        |             |        |             |
| Number of strokes                   | 7,518  | (100%)      | 4,104  | (54.6%)     | 3,414  | (45.4%)     |
| Age at stroke, years (median (IQR)) | 80.0   | (75.5-86.7) | 81.8   | (70.8-83.7) | 77.9   | (70.8-83.7) |
| Stroke                              |        |             |        |             |        |             |
| 433 (ICD-9)                         | 109    | (1.4%)      | 43     | (1%)        | 66     | (1.9%)      |
| 434 (ICD-9)                         | 654    | (8.7%)      | 337    | (8.2%)      | 317    | (9.3%)      |
| 436 (ICD-9)                         | 1,288  | (17.1%)     | 709    | (17.3%)     | 579    | (17.0%)     |
| I63 (ICD-10)                        | 3,581  | (47.6%)     | 1,999  | (48.7%)     | 1,582  | (46.3%)     |
| I64 (ICD-10)                        | 1,886  | (25.1%)     | 1,016  | (24.8%)     | 870    | (25.5%)     |
| Diagnosis type                      |        |             |        |             |        |             |
| Principal                           | 5,916  | (78.7%)     | 3,227  | (78.6%)     | 2,689  | (78.8%)     |
| Additional                          | 1,602  | (21.3%)     | 877    | (21.4%)     | 725    | (21.2%)     |
| Weekly counts (median (IQR))        | 7      | (5-10)      | 4      | (2-6)       | 3      | (2-5)       |
| Time to stroke, days (median (IQR)) | 645    | (14-1776)   | 641    | (17-1749)   | 654    | (10-1814)   |

AF: atrial fibrillation, ICD: International Classification of Diseases, IQR: Inter quartile range

Figure 1: Observed incidence rates of first-time hospitalizations with a principal or additional diagnosis of atrial fibrillation per 1,000 person-years for the Danish and New Zealand population.

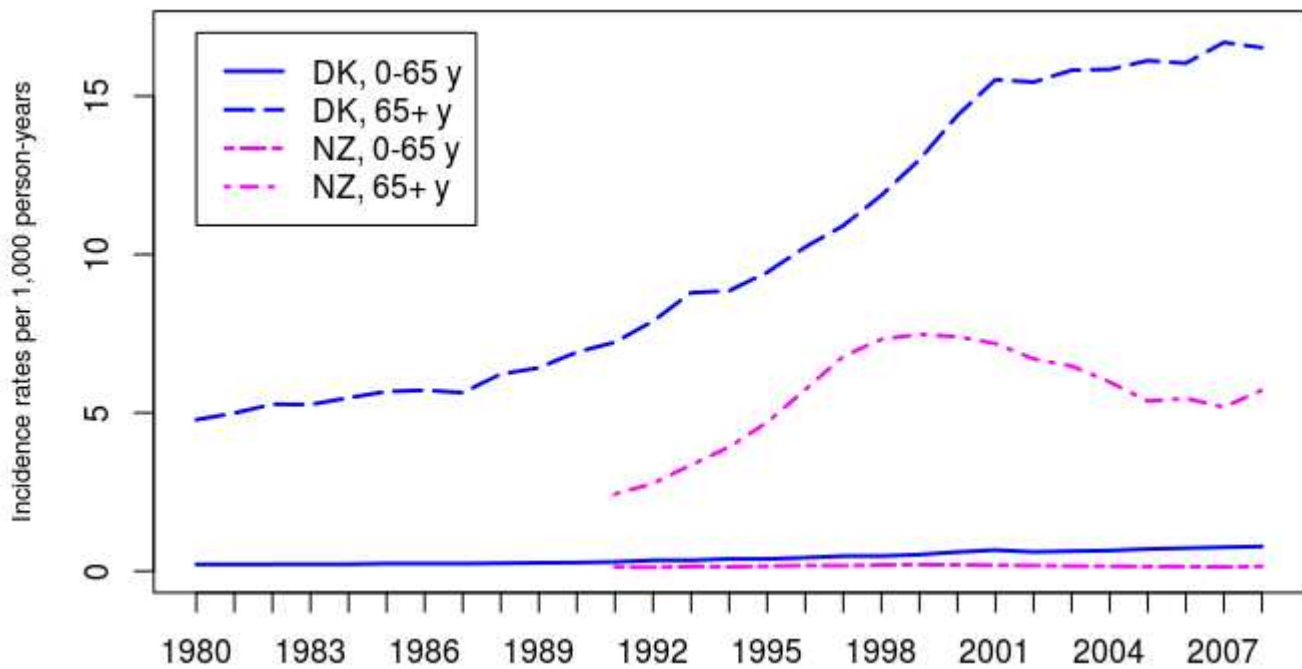

review only

Figure 2: Estimated seasonal variation in incidence rates of hospitalisations with stroke in patients with atrial fibrillation in Denmark (solid line) and New Zealand (dashed line) adjusted for overall trend. The seasonal variation is represented as the percentual deviation in incidence rates from annual median, and incidence rates are aggregated to weekly observations. Shaded bands represent 95% confidence intervals.

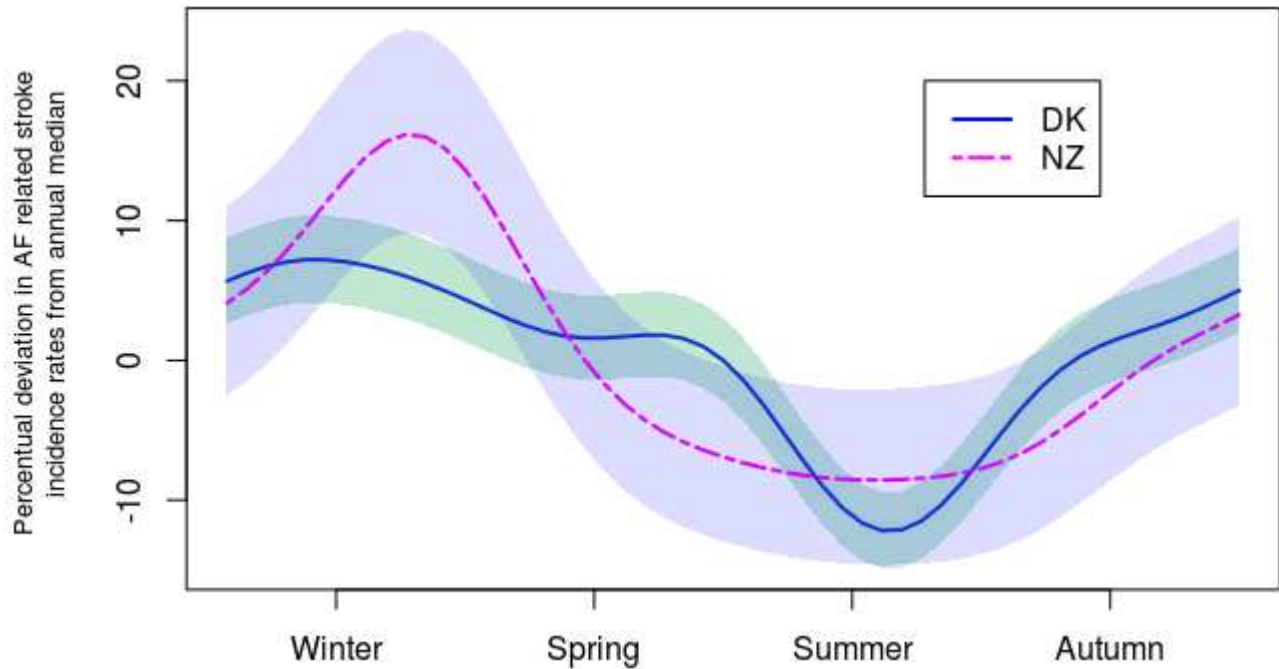

Figure 3: Estimated overall trend of Danish (solid line) and New Zealand (dashed line) weekly incidence rates of hospitalisations with stroke in atrial fibrillation patients per 100 person-years adjusted for seasonality. Shaded bands represent 95% confidence intervals.

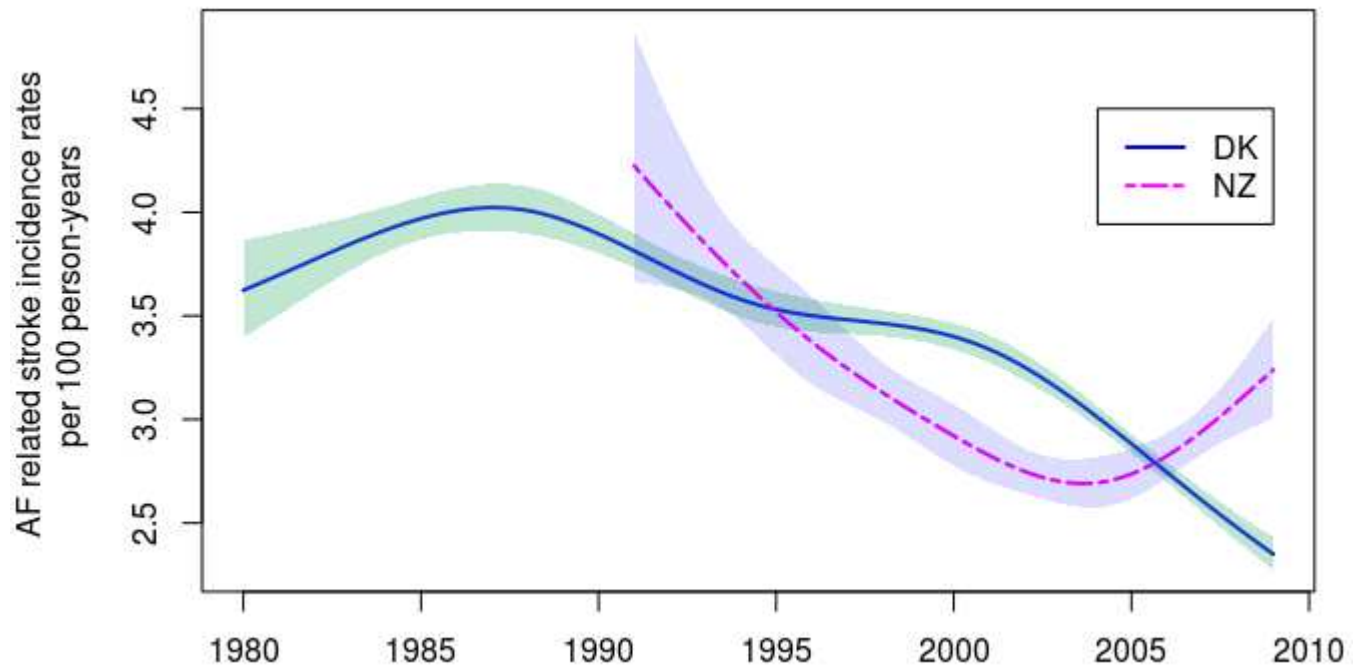



1  
2  
3  
4  
5  
6  
7  
8  
9  
10  
11  
12  
13  
14  
15  
16  
17  
18  
19  
20  
21  
22  
23  
24  
25  
26  
27  
28  
29  
30  
31  
32  
33  
34  
35  
36  
37  
38  
39  
40  
41  
42  
43  
44  
45  
46  
47  
48  
49  
50  
51  
52  
53  
54  
55  
56  
57  
58  
59  
60

Figure 4: Observed 30-days case fatality risk for stroke in atrial fibrillation patients in Denmark and New Zealand

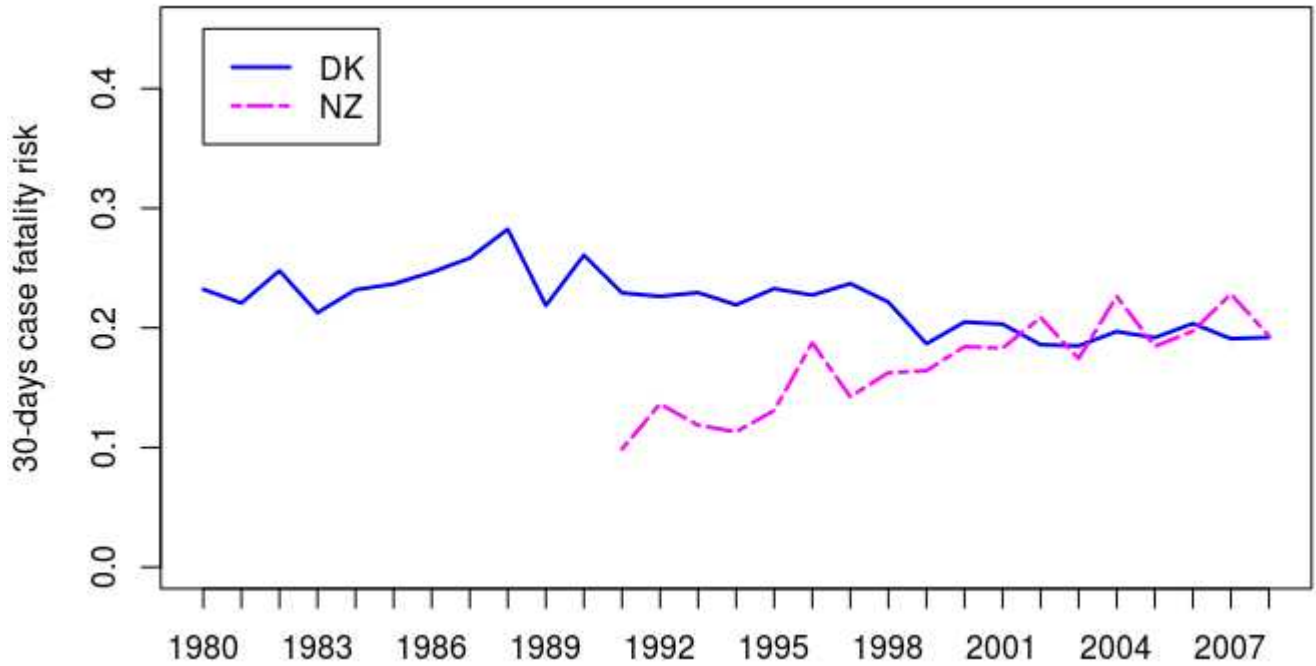

STROBE Statement—Checklist of items that should be included in reports of *cohort studies*

|                              | Item No | Recommendation                                                                                                                                                                                                                                                                                                                                                                                                |
|------------------------------|---------|---------------------------------------------------------------------------------------------------------------------------------------------------------------------------------------------------------------------------------------------------------------------------------------------------------------------------------------------------------------------------------------------------------------|
| <b>Title and abstract</b>    | 1       | (a) Indicate the study's design with a commonly used term in the title or the abstract<br>(b) Provide in the abstract an informative and balanced summary of what was done and what was found                                                                                                                                                                                                                 |
| <b>Introduction</b>          |         |                                                                                                                                                                                                                                                                                                                                                                                                               |
| Background/rationale         | 2       | Explain the scientific background and rationale for the investigation being reported                                                                                                                                                                                                                                                                                                                          |
| Objectives                   | 3       | State specific objectives, including any prespecified hypotheses                                                                                                                                                                                                                                                                                                                                              |
| <b>Methods</b>               |         |                                                                                                                                                                                                                                                                                                                                                                                                               |
| Study design                 | 4       | Present key elements of study design early in the paper                                                                                                                                                                                                                                                                                                                                                       |
| Setting                      | 5       | Describe the setting, locations, and relevant dates, including periods of recruitment, exposure, follow-up, and data collection                                                                                                                                                                                                                                                                               |
| Participants                 | 6       | (a) Give the eligibility criteria, and the sources and methods of selection of participants. Describe methods of follow-up<br>(b) For matched studies, give matching criteria and number of exposed and unexposed                                                                                                                                                                                             |
| Variables                    | 7       | Clearly define all outcomes, exposures, predictors, potential confounders, and effect modifiers. Give diagnostic criteria, if applicable                                                                                                                                                                                                                                                                      |
| Data sources/<br>measurement | 8*      | For each variable of interest, give sources of data and details of methods of assessment (measurement). Describe comparability of assessment methods if there is more than one group                                                                                                                                                                                                                          |
| Bias                         | 9       | Describe any efforts to address potential sources of bias                                                                                                                                                                                                                                                                                                                                                     |
| Study size                   | 10      | Explain how the study size was arrived at                                                                                                                                                                                                                                                                                                                                                                     |
| Quantitative variables       | 11      | Explain how quantitative variables were handled in the analyses. If applicable, describe which groupings were chosen and why                                                                                                                                                                                                                                                                                  |
| Statistical methods          | 12      | (a) Describe all statistical methods, including those used to control for confounding<br>(b) Describe any methods used to examine subgroups and interactions<br>(c) Explain how missing data were addressed<br>(d) If applicable, explain how loss to follow-up was addressed<br>(e) Describe any sensitivity analyses                                                                                        |
| <b>Results</b>               |         |                                                                                                                                                                                                                                                                                                                                                                                                               |
| Participants                 | 13*     | (a) Report numbers of individuals at each stage of study—eg numbers potentially eligible, examined for eligibility, confirmed eligible, included in the study, completing follow-up, and analysed<br>(b) Give reasons for non-participation at each stage<br>(c) Consider use of a flow diagram                                                                                                               |
| Descriptive data             | 14*     | (a) Give characteristics of study participants (eg demographic, clinical, social) and information on exposures and potential confounders<br>(b) Indicate number of participants with missing data for each variable of interest<br>(c) Summarise follow-up time (eg, average and total amount)                                                                                                                |
| Outcome data                 | 15*     | Report numbers of outcome events or summary measures over time                                                                                                                                                                                                                                                                                                                                                |
| Main results                 | 16      | (a) Give unadjusted estimates and, if applicable, confounder-adjusted estimates and their precision (eg, 95% confidence interval). Make clear which confounders were adjusted for and why they were included<br>(b) Report category boundaries when continuous variables were categorized<br>(c) If relevant, consider translating estimates of relative risk into absolute risk for a meaningful time period |

|    |                          |    |                                                                                        |
|----|--------------------------|----|----------------------------------------------------------------------------------------|
| 1  | Other analyses           | 17 | Report other analyses done—eg analyses of subgroups and interactions, and              |
| 2  |                          |    | sensitivity analyses                                                                   |
| 3  | <b>Discussion</b>        |    |                                                                                        |
| 4  | Key results              | 18 | Summarise key results with reference to study objectives                               |
| 5  | Limitations              | 19 | Discuss limitations of the study, taking into account sources of potential bias or     |
| 6  |                          |    | imprecision. Discuss both direction and magnitude of any potential bias                |
| 7  | Interpretation           | 20 | Give a cautious overall interpretation of results considering objectives, limitations, |
| 8  |                          |    | multiplicity of analyses, results from similar studies, and other relevant evidence    |
| 9  | Generalisability         | 21 | Discuss the generalisability (external validity) of the study results                  |
| 10 | <b>Other information</b> |    |                                                                                        |
| 11 | Funding                  | 22 | Give the source of funding and the role of the funders for the present study and, if   |
| 12 |                          |    | applicable, for the original study on which the present article is based               |
| 13 |                          |    |                                                                                        |
| 14 |                          |    |                                                                                        |
| 15 |                          |    |                                                                                        |
| 16 |                          |    |                                                                                        |
| 17 |                          |    |                                                                                        |
| 18 |                          |    |                                                                                        |
| 19 |                          |    |                                                                                        |
| 20 |                          |    |                                                                                        |
| 21 |                          |    |                                                                                        |
| 22 |                          |    |                                                                                        |
| 23 |                          |    |                                                                                        |
| 24 |                          |    |                                                                                        |
| 25 |                          |    |                                                                                        |
| 26 |                          |    |                                                                                        |
| 27 |                          |    |                                                                                        |
| 28 |                          |    |                                                                                        |
| 29 |                          |    |                                                                                        |
| 30 |                          |    |                                                                                        |
| 31 |                          |    |                                                                                        |
| 32 |                          |    |                                                                                        |
| 33 |                          |    |                                                                                        |
| 34 |                          |    |                                                                                        |
| 35 |                          |    |                                                                                        |
| 36 |                          |    |                                                                                        |
| 37 |                          |    |                                                                                        |
| 38 |                          |    |                                                                                        |
| 39 |                          |    |                                                                                        |
| 40 |                          |    |                                                                                        |
| 41 |                          |    |                                                                                        |
| 42 |                          |    |                                                                                        |
| 43 |                          |    |                                                                                        |
| 44 |                          |    |                                                                                        |
| 45 |                          |    |                                                                                        |
| 46 |                          |    |                                                                                        |
| 47 |                          |    |                                                                                        |
| 48 |                          |    |                                                                                        |
| 49 |                          |    |                                                                                        |
| 50 |                          |    |                                                                                        |
| 51 |                          |    |                                                                                        |
| 52 |                          |    |                                                                                        |
| 53 |                          |    |                                                                                        |
| 54 |                          |    |                                                                                        |
| 55 |                          |    |                                                                                        |
| 56 |                          |    |                                                                                        |
| 57 |                          |    |                                                                                        |
| 58 |                          |    |                                                                                        |
| 59 |                          |    |                                                                                        |
| 60 |                          |    |                                                                                        |

\*Give information separately for exposed and unexposed groups.

**Note:** An Explanation and Elaboration article discusses each checklist item and gives methodological background and published examples of transparent reporting. The STROBE checklist is best used in conjunction with this article (freely available on the Web sites of PLoS Medicine at <http://www.plosmedicine.org/>, Annals of Internal Medicine at <http://www.annals.org/>, and Epidemiology at <http://www.epidem.com/>). Information on the STROBE Initiative is available at <http://www.strobe-statement.org>.



**Seasonal variation and trend in hospital admissions for stroke in patients with atrial fibrillation in Denmark and New Zealand: analysis of hospital discharge data from 1977 to 2008**

|                                 |                                                                                                                                                                                                                                                                                                                                                                                                                                                                                                                                                                                                                                                                                                                                                                 |
|---------------------------------|-----------------------------------------------------------------------------------------------------------------------------------------------------------------------------------------------------------------------------------------------------------------------------------------------------------------------------------------------------------------------------------------------------------------------------------------------------------------------------------------------------------------------------------------------------------------------------------------------------------------------------------------------------------------------------------------------------------------------------------------------------------------|
| Journal:                        | <i>BMJ Open</i>                                                                                                                                                                                                                                                                                                                                                                                                                                                                                                                                                                                                                                                                                                                                                 |
| Manuscript ID:                  | bmjopen-2012-001210.R2                                                                                                                                                                                                                                                                                                                                                                                                                                                                                                                                                                                                                                                                                                                                          |
| Article Type:                   | Research                                                                                                                                                                                                                                                                                                                                                                                                                                                                                                                                                                                                                                                                                                                                                        |
| Date Submitted by the Author:   | 23-Jul-2012                                                                                                                                                                                                                                                                                                                                                                                                                                                                                                                                                                                                                                                                                                                                                     |
| Complete List of Authors:       | Christensen, Anette Luther; Aalborg Hospital, Aarhus University Hospital, Department of Cardiology, Aalborg AF Study Group, Center for Cardiovascular Research<br>Rasmussen, Lars Hvilsted; Aalborg Hospital, Aarhus University Hospital, Department of Cardiology, Aalborg AF Study Group, Center for Cardiovascular Research<br>Baker, Michael; Otago University, Public Health<br>Lip, Gregory; University Department of Medicine<br>Dethlefsen, Claus; Aalborg Hospital, Aarhus University Hospital, Department of Cardiology, Aalborg AF Study Group, Center for Cardiovascular Research<br>Larsen, Torben Bjerregaard; Aalborg Hospital, Aarhus University Hospital, Department of Cardiology, Aalborg AF Study Group, Center for Cardiovascular Research |
| <b>Primary Subject Heading</b>: | Cardiovascular medicine                                                                                                                                                                                                                                                                                                                                                                                                                                                                                                                                                                                                                                                                                                                                         |
| Secondary Subject Heading:      | Epidemiology, Public health, Neurology                                                                                                                                                                                                                                                                                                                                                                                                                                                                                                                                                                                                                                                                                                                          |
| Keywords:                       | Stroke < NEUROLOGY, Atrial fibrillation, Seasonal variation, EPIDEMIOLOGY, Cardiology < INTERNAL MEDICINE, Poisson regression                                                                                                                                                                                                                                                                                                                                                                                                                                                                                                                                                                                                                                   |
|                                 |                                                                                                                                                                                                                                                                                                                                                                                                                                                                                                                                                                                                                                                                                                                                                                 |

SCHOLARONE™  
Manuscripts

## Seasonality, incidence and prognosis in atrial fibrillation and stroke in Denmark and New Zealand

Corresponding author:

Research Fellow Anette Luther Christensen

Department of Cardiology, Aalborg AF Study Group, Center for Cardiovascular Research, Aalborg

Hospital, Aarhus University Hospital, Aalborg, Denmark

Aalborg Hospital Science and Innovation Center

Sdr. Skovvej 15

9000 Aalborg

Denmark

Mail: [anluc@rn.dk](mailto:anluc@rn.dk)

Phone: +45 9932 6885

Fax: +45 9932 6813

Head of Research Lars Hvilsted Rasmussen

Department of Cardiology, Aalborg AF Study Group, Center for Cardiovascular Research, Aalborg

Hospital, Aarhus University Hospital, Aalborg, Denmark

Thrombosis Research Unit, Faculty of Medicine, Aalborg University, Aalborg, Denmark

Associate Professor Michael G. Baker

Department of Public Health, University of Otago, Wellington, New Zealand

Professor Gregory Y. H. Lip

University of Birmingham Centre for Cardiovascular Sciences, City Hospital, Birmingham, United

Kingdom

Associate Professor Claus Dethlefsen

Department of Cardiology, Aalborg AF Study Group, Center for Cardiovascular Research, Aalborg

Hospital, Aarhus University Hospital, Aalborg, Denmark

Associate Professor Torben Bjerregaard Larsen

Department of Cardiology, Aalborg AF Study Group, Center for Cardiovascular Research, Aalborg

Hospital, Aarhus University Hospital, Aalborg, Denmark

Thrombosis Research Unit, Faculty of Medicine, Aalborg University, Aalborg, Denmark

Keywords: Stroke, Atrial fibrillation, Seasonal variation, Epidemiology, Cardiology, Poisson regression

Word Count: 3617

**Abstract:**

Objectives: There are relatively few large studies of seasonal variation in the occurrence of stroke in patients with AF. We investigated the seasonal variation in incidence rates of hospitalizations with stroke in patients from Denmark and New Zealand.

Design: Cohort study.

Setting: Nationwide hospital discharge data from Denmark and New Zealand.

Participants: 243,381 (median age 75) subjects having a first-time hospitalization with AF in Denmark and 51,480 (median age 76) subjects in New Zealand constituted the study population. Subjects with previous hospitalization with stroke were excluded.

Primary and secondary effect measures: Peak-to-trough ratio of the seasonal variation in weekly incidence rates of stroke in AF patients adjusted for an overall trend was primary effect measure and was assessed using a log-linear Poisson regression model. Secondary effect measures were incidence rate ratios of AF and 30-days case fatality for stroke patients.

Results: Incidence rates of AF per 1,000 person-years in Denmark increased by 5.4% (95%CI: 5.3-5.7%) for patients aged <65 and 5.0% (95%CI: 4.9-5.1%) for patients aged  $\geq 65$ , whereas the increase was 0.2% (95%CI: -0.2-0.6%) for patients aged <65 and 2.6% (95%CI: 2.4-2.8%) for patients aged  $\geq 65$  in New Zealand. In Denmark 36,088 subjects were hospitalized with stroke, and 7,518 subjects in New Zealand, both showing peaks during winter with peak-to-trough ratios of 1.22 and 1.27, respectively and a decreasing trend. The 30-days case fatality risk for stroke patients having AF is now (2000-08) about 20% in both countries.

Conclusions: Although incidence rates of hospitalizations with stroke in patients with AF have decreased in recent years, this remains a common AF complication with a high case fatality risk. The marked winter peak in incidence rates of hospitalization with stroke in AF patients suggests that there are opportunities to reduce this complication. Further studies are necessary to identify how to optimize treatment of AF and prevention of stroke.

**Article Focus:**

Explore trends in incidence rates of atrial fibrillation in the entire Danish and New Zealand population.

Estimate the peak-to-trough ratio of hospitalisations with stroke in atrial fibrillation patients in a cohort study design based on discharge data from Denmark and New Zealand using a log-linear Poisson regression model adjusted for an overall trend.

Estimate 30-days case fatality risks for stroke in atrial fibrillation patients in Denmark and New Zealand.

**Key Messages:**

The incidence rates of atrial fibrillation in entire Danish and New Zealand population have increased since start of registration of hospitalisations until 2008.

Hospitalisations with stroke in atrial fibrillation patients show similar seasonal variation with a peak during winter and trough during summer in countries in opposite hemispheres.

The 30-days case fatality risk for stroke in atrial fibrillation patients seems to have been at a constant level during 2000-2008.

**Strengths and limitations:**

The main strength of this study is that study cohort is based on two entire national populations.

The main limitation of this study was inherent to its observational nature since the negative predictive value of discharge data may not be assessed.

The cohort study design indicates associations to be explored further to identify causality through randomised controlled studies.

## 1. Introduction

Atrial fibrillation (AF) is the most common sustained cardiac rhythm disorder, and is associated with a substantial risk of mortality and morbidity from thromboembolism and especially thromboembolic stroke. Well-established risk factors for stroke in AF patients are prior stroke, advanced age, hypertension, diabetes mellitus, moderate-severe systolic dysfunction and vascular disease [1–3].

A seasonal variation in acute presentation with various cardiovascular disorders has been reported, with data on acute presentations with myocardial infarction, sudden death, rupture/dissection of aortic aneurysms, heart failure hospitalizations and venous thromboembolism [4–9] all showing a seasonal peak during winter. Acute stroke and transient ischemic attack show a similar pattern [10,11].

In addition, a seasonal variation in paroxysmal AF has been documented by 24-hour Holter electrocardiogram, with maximum and minimum incidences in autumn and summer, respectively [12]. It has been suggested that AF hospital admissions may also exhibit a seasonal variation, with the risk being modestly higher during the winter and inversely associated with outdoor temperature [13]. Nonetheless, this effect may be small and has been considered unlikely to be significant for policy or etiological research purposes [14]. However, this may reflect the limitations of relatively small single centre studies, and large “real world” population-based analyses may be needed. Indeed, using the linked Scottish Morbidity Record scheme between 1990 and 1996, there was a total of 33,582 male and 34,463 female AF hospitalizations, which showed a substantial seasonal variation in AF hospitalizations and deaths, particularly in the elderly [15].

Few studies exist on seasonal variation in occurrences of stroke and mortality risk after stroke in patients with AF. One analysis from the Danish National Registry of Patients has previously found a seasonal variation in stroke occurrence in patients with non-valvular AF but no effect of season on mortality after stroke [16]. One small series of approximately 300 Greek patients with first-ever cardio embolic acute stroke due to AF also revealed a seasonal peak during winter and a decline of stroke occurrence during summer [17].

Assuming a seasonal variation in hospital admissions with stroke in patients with AF, we would expect to see similar temporal patterns in countries from different parts of the world. However, we are unaware of any data comparing seasonal changes over a comparable time period between two countries, irrespective of seasonality shift by being in the northern or southern hemisphere. In this study we described the occurrences of hospitalizations with stroke in patients with AF, including estimating the seasonal variation in the two countries investigating the temporal patterns from the northern and southern hemisphere. Furthermore, we described the overall trend in incidence rates of hospitalization admissions for both AF and stroke in patients with AF over a twenty year period. Differences in annual 30-days case fatality risks between countries were also assessed.



## 2. Material and methods

### 2.1 Study Period and Study Population

The study period in Denmark was from 1 January 1977 and in New Zealand from 1 January 1988, both to 31 December 2008. Hospitalisations with first time non-valvular AF and stroke were recorded using the International Classification of Diseases (ICD). Both principal and additional diagnoses were included for analysis. No discrimination was made between ischemic or hemorrhagic strokes.

The Danish cohort was identified in the Danish National Registry of Patients, starting in 1977, using the Danish Personal Identification number. This is a unique and national identification number which is part of the personal information stored in the Civil Registration System. The Danish study population in the present study included Danish residents who developed incident AF from 1977 to 2008. ICD codes were used to extract admissions for AF. The 8th revision (ICD-8) was used until 1994, and after 1994 the 10th revision (ICD-10) was used. AF and atrial flutter were coded separately in ICD-8 (codes 427.93 and 427.94), whereas in ICD-10, AF and atrial flutter have a single ICD code (I48). Therefore, atrial flutter cases have also been included in the present study. In Denmark, incidences of stroke were found in the Danish National Registry of Patients, using ICD-8 (433, 434, and 436) and ICD-10 (I63, I64). To reduce inclusion of prevalent cases of both AF and stroke in AF patients, identified cases before 1980 were excluded from the analyses for the Danish cohort.

The cohort from New Zealand was identified from 1988 to 2008, using the National Minimum Dataset. The National Minimum Dataset, managed by the New Zealand Ministry of Health, holds information on all publicly funded hospitalizations in New Zealand. Each hospitalization is linked with the patient's National Health Index (NHI) number, which is a unique number provided to each person using health and disability support services in New Zealand. This index is stored in the NHI database along with demographic details of the person. In the National Minimum Dataset ICD 9th revision (ICD-9) was used until June 1999, and after that ICD-10 was used. Similar to the Danish data, AF and atrial flutter were coded separately in ICD-9 (codes 427.31 and 427.32), whereas in ICD-10, AF and atrial flutter have a single ICD code (I48). In New Zealand, incidences of stroke were found in the National Minimum Dataset using ICD-9 (433, 434, 436) and ICD-10 (I63, I64). To avoid including prevalent cases of both AF and stroke in AF patients, identified cases before 1991 were excluded from the analyses for the New Zealand cohort.

In Denmark annual population figures were obtained from Statistics Denmark, whereas in New Zealand only five-year population figures were available from Statistics New Zealand starting from 1996. Annual estimates for the New Zealand population from 1988 to 2008 were obtained by linear inter- and extrapolation.

Comorbidities were assessed by identifying hospitalizations with either congestive heart failure (ICD8: 427.09, 428, ICD9: 428, ICD10: I11.09, I50), hypertension (ICD8: 400-404, ICD9: 401-405, ICD10: I10-I13, I15),

1  
2  
3 diabetes (ICD8: 249, 250, ICD9: 250, ICD10: E11, E14), acute myocardial infarction (ICD8: 410, ICD9: 410,  
4 ICD10: I21, I22), peripheral artery disease (ICD8: 440.2, 443, 444, ICD9: 440, 443, 444, ICD10: I70.2, I73.9,  
5 I74.5), or coronary artery disease (ICD8: 412, ICD9: 414, ICD10: I25.1). One subject may have more than one  
6 comorbidity.  
7  
8  
9

## 10 2.2 Statistical analysis

11  
12 We define three effect measures for analyses. First, incidence rates of AF, defined as the annual number of  
13 hospitalizations with AF divided by the annual population size. Second, weekly incidence rates of stroke in AF  
14 patients defined as the weekly number of first time hospitalizations with stroke having previous hospital admissions  
15 for AF divided by the weekly person-time at risk i.e. for a given week the number of AF patients with no previous  
16 stroke. Third, 30-days case fatality risk, defined as the annual number of death among stroke patients having AF  
17 divided by the annual number of stroke patients having AF.  
18  
19  
20  
21  
22

23 A log-linear Poisson regression model was fitted to incidence rates of AF, adjusting for a linear trend and modeling  
24 an interaction between trend and country. The analysis was stratified on age groups (<65 and  $\geq 65$  years of age).  
25 Only annual incidence rates from 1991 to 2008 were analyzed.  
26  
27  
28

29 A log-linear Poisson regression model was fitted to weekly incidence rates of stroke in AF patients adjusted for a  
30 non-linear trend and a seasonal variation component. The seasonal variation component was specified as a sum of  
31 four sinusoids with frequencies one to four [18]. The overall trend was specified as a restricted cubic spline with  
32 five knots [19]. As a measurement of the seasonal variation we estimated the peak-to-trough ratio, which is an  
33 incidence rate ratio.  
34  
35  
36  
37

38 A logit-linear logistic regression model was fitted to 30-days case fatality risks, adjusting for a linear trend and  
39 modeling an interaction between trend and country.  
40  
41

42 Assessments of statistically significant interaction between trend and countries were performed by a likelihood  
43 ratio test. Tests for overdispersion of Poisson models and goodness of fit, including tests for all models were  
44 performed.  
45  
46  
47

48 P-values less than 5% were considered statistically significant. All analyses were performed in R version 2.15.1  
49 [20] using the package `Peak2Trough` [21].  
50  
51

## 52 3. Results

53  
54 Demographic descriptions of the two cohorts are found in Table 1. For the Danish cohort, we identified 243,381  
55 incident hospitalizations with AF for the 29-year period from 1980 to 2008, of which 48% were females. For the  
56 New Zealand cohort 51,480 similar subjects were identified for the 18-year period from 1991 to 2008 (48%  
57  
58  
59  
60

1  
2  
3 females). The median age at time of AF in the Danish cohort was 75.2 years, which was similar to the New  
4 Zealand cohort (75.8 years).  
5  
6

7  
8 The distribution of diagnosis type differed in the two cohorts (Table 1). In both cohorts more than half of AF  
9 diagnoses were given as a supplementary diagnosis to a principal diagnosis, with a higher proportion in New  
10 Zealand, than in Denmark. The median weekly count of AF hospitalizations in Denmark was 142, whereas in New  
11 Zealand the weekly count was 53. There was no significant sex difference in weekly counts between the cohorts.  
12  
13

14  
15 Differences in comorbidities were apparent between Denmark and New Zealand. In Table 2, characteristics of  
16 comorbidities for all AF patients are given. In general, comorbidities were more present in the New Zealand cohort  
17 compared with the Danish cohort except for diabetes.  
18  
19

20  
21 Incidence rates of AF hospitalizations in Denmark and New Zealand per 1,000 person-years are shown in Figure 1.  
22 For both countries, the incidence rates for patients younger than 65 years of age were markedly lower than for  
23 patients above 65 years of age. A likelihood ratio test indicates a significant interaction between trend and country,  
24 i.e. difference in increase over time in incidence rates between countries, for both age groups (both p-values less  
25 than 0.001). In Denmark, the incidence rates increased by 5.0% annually (95% CI: 4.9-5.1%) for patients above 65  
26 years of age compared with only an increase of 2.6% annually (95% CI: 2.4-2.8%) for the same patients in New  
27 Zealand. For the younger patients the incidence rates increased by 5.4% annually (95% CI: 5.3-5.7%) in Denmark  
28 and 0.2% (95% CI: -0.2-0.58%) in New Zealand.  
29  
30  
31  
32  
33

34  
35 During follow-up 36,088 subjects were hospitalized with stroke (55.1% females) in the Danish cohort. In New  
36 Zealand the figures were 7,518 (54.6% females). The median weekly count of stroke in Denmark was 22 and 7 in  
37 New Zealand. Table 3 shows further follow-up characteristics of the two cohorts.  
38  
39

40  
41 The seasonal variations for both countries estimated by fitting the Poisson regression model and adjusted for an  
42 overall trend are shown in Figure 2. Time for seasonal peak in both countries was winter and time for seasonal  
43 trough was summer. The peak-to-trough ratio in Denmark was 1.22, i.e. the risk of being hospitalized with stroke in  
44 AF patients at peak time in winter is 22% higher compared to summer. In New Zealand the peak-to-trough ratio  
45 was 1.27.  
46  
47

48  
49 Weekly incidence rates of hospitalizations with stroke in AF patients were overall decreasing in both countries  
50 during the study period; see Figure 3 which shows the estimated trends. From 1985 to the end of study period the  
51 incidence rates in Denmark decreased markedly reaching a plateau of approximately 3.5 hospitalizations per 100  
52 person-years during the period from the mid 1990s to 2000, followed by a further decline. Similarly in New  
53 Zealand the incidence rates decrease markedly during the first 14 years from 1991 to 2004.  
54  
55  
56  
57  
58  
59  
60

1  
2  
3  
4 The 30-days case fatality risks for Denmark and New Zealand are shown in Figure 4. The analysis indicated that  
5 the odds ratio for death within 30 days after stroke in AF patients decreased by 1.1% (95% CI: 0.83-1.4%) annually  
6 in Denmark. By contrast the odds ratio increased by 0.87% (95% CI: -0.31-2.07%) annually in New Zealand. A  
7 likelihood ratio test indicated strong evidence in favor of interaction between trend and country (p=0.002). Overall,  
8 the 30-days case fatality risk converged in both countries towards a value of about 20% during the most recent  
9 period.  
10  
11  
12

13  
14 All models were assessed for overdispersion and revealed no indication of such.  
15

#### 16 17 **4. Discussion**

18  
19 This study shows that stroke remains a common complication of AF. Stroke in AF patients is serious with a 20%  
20 30-days case fatality risk in recent years (2000-08). This study found evidence of a marked seasonal variation in  
21 incidence rates of hospitalizations with stroke in AF patients, with a peak in winter and a trough in summer in both  
22 countries. The analysis indicated a difference in overall trend in incidence rates of hospitalizations with stroke in  
23 AF patients between countries, Denmark tending to have lower incidence rates, compared to New Zealand. In  
24 contrast, we showed a highly significant increase in incidence rates of AF over time in both countries. Furthermore,  
25 we found differences in the type of diagnoses in the two countries.  
26  
27  
28  
29  
30

31 The main limitation of this study was inherent to its observational nature. Even though the positive predictive value  
32 of the diagnosis of AF is very high in the Danish registry (93%) [22,23], the negative predictive value of such data  
33 sources is harder to assess. Consequently, studies based on hospital discharge registries may be affected by  
34 misclassification and inclusion bias - for example, by including only patients admitted to hospital with AF we  
35 might have increased the proportion of patients who were at higher risk of thromboembolic events and death. The  
36 incidence of stroke was defined by the Danish National Registry of Patients, and not all stroke diagnoses were  
37 defined by cerebral imaging. The diagnosis of stroke has previously been validated in the Danish registry; with a  
38 positive predictive value of ischemic stroke of 97% [24]. Also, we are limited by the inability to differentiate  
39 between ischemic and hemorrhagic strokes, but from a Danish stroke registry we know that stroke in patients with  
40 AF is predominantly embolic [25]. Stroke in AF patients by definition requires hospitalization and recorded  
41 diagnosis for two separate conditions, so trends in incidence rates are determined by factors that affect both of these  
42 events and may be complex to interpret. Misclassification or under-reporting of comorbidities, especially  
43 hypertension and diabetes, may have occurred [26], and we did not have data on the nature of AF in any of the  
44 cohorts. No data exist on the validity of diagnoses on AF and stroke from the National Minimum Dataset in New  
45 Zealand. Our study included patients from Denmark and New Zealand, who were treated in different settings and  
46 probably with different methods. However, the range of patients was similar regarding age and co-morbid  
47 conditions. The nature of exposures was comparable, and the definitions of outcomes were all defined by  
48 comparable ICD-coding in the two countries. The differences in health care systems in the two countries can hardly  
49  
50  
51  
52  
53  
54  
55  
56  
57  
58  
59  
60

1  
2  
3 influence the referral pattern around AF. Furthermore, comparison of the two countries brings forward interesting  
4 questions when we compare with similar but smaller studies from other countries.  
5  
6

7  
8 Consistent with another study we showed that the seasonal variation in incidence rates of hospitalizations stroke in  
9 AF patients in both countries was characterized by a peak in winter and trough in summer [16]. This pattern is  
10 reported for several other cardiovascular diseases [4–12,15,17]. The previously reported peak-to-trough ratio from  
11 Denmark of 1.11 and pattern of seasonality [16] are similar to the results reported in this study, however the peak-  
12 to-trough ratio is slightly lower. This may be due to the difference in resolution of data. In the present study weekly  
13 incidence rates were analyzed as opposed to monthly incidence rates in Frost et al [16]. The finding that the  
14 characteristics of the seasonal variation in both countries are similar may be important in the search for identifying  
15 underlying risk factors causing stroke in AF patients. Such factors may be climate factors, e.g. temperature,  
16 humidity and hours of sunshine, as well as seasonal variation in occurrences of risk factors for both AF and stroke,  
17 e.g. hypertension [27,28] and infectious diseases [29]. The difference in peak-to-trough ratio between two  
18 countries, may also lead to the identification of causes that may explain the seasonality, by considering differences  
19 between the two countries, for instance climatic differences, housing conditions, and life style patterns [30,31].  
20  
21  
22  
23  
24  
25  
26  
27

28 The overall trend in weekly incidence rates of hospitalizations with stroke in AF patients in Denmark found in this  
29 study show a markedly decrease from late 1980s. During the late eighties and early nineties several studies  
30 regarding AF and its potential increasing risk of stroke were published [32,33], which led to introduction of oral  
31 anticoagulant treatment [34,35]. This concurrence reveals the prophylactic effects of anticoagulant treatment,  
32 preventing AF patients to develop stroke. However, the overall trend in incidence rates of stroke in AF patients in  
33 New Zealand indicates that the awareness of AF and its consequences was not as present until the early nineties.  
34 Furthermore, this study indicates that the trend in incidence rates in Denmark is decreasing further towards the end  
35 of the study period, whereas in New Zealand the trend seems to increase.  
36  
37  
38  
39  
40  
41

42 The risk of stroke is multi-factorial, and is affected by risk factors such as history of hypertension, current smoking,  
43 diet, physical activity, diabetes mellitus, alcohol intake, psychosocial stress and depression, cardiac causes (e.g.  
44 AF), and ratio of apolipoproteins B to A1 [36]. Indeed, greater awareness of some risk factors e.g. blood pressure  
45 control and smoking cessation may have contributed to a lowering of hospitalizations with stroke in AF patients  
46 over this period. Also, a managed care approach to high risk patients (e.g. recent transient ischemic attack) may  
47 have led to the reduction in stroke hospitalizations in more recent years [37]. This is clearly a positive observation,  
48 given that stroke in AF patients are associated with a higher mortality, as well as a greater morbidity and disability.  
49  
50  
51  
52  
53

54 Whilst the annual incidence rates of hospitalizations with AF were lower in New Zealand compared with Denmark  
55 for both age groups there was still a highly significant increase over time in incidence rates for both countries and  
56 both age groups. This is consistent with reported increasing trends in hospitalization for AF in the United States,  
57 between 1985 and 1999 [38]. In the analysis by Wattigney et al, US hospitalizations for AF increased dramatically  
58  
59  
60

1  
2  
3 (2- to 3-fold) in the period 1985-1999. In their study, women were hospitalized with AF more often than men on an  
4 annual basis, although the age-standardized prevalence of hospitalizations was greater in men than women. Women  
5 hospitalized with AF tended to be older than men, which our results confirm.  
6  
7

8  
9 Unsurprisingly we found the median age of both Danish and New Zealand cohorts to be similar (approximately 75  
10 years). The incidence rates for patients younger than 65 years of age were much lower than for patients above 65  
11 years of age. Indeed, these observations are consistent with other epidemiological data including analyses of  
12 hospitalization data [22,38–40]. There was no significant sex difference in weekly counts in either cohort. Of note,  
13 the median weekly count of AF hospitalizations and stroke in AF patients in Denmark were higher than in New  
14 Zealand. The reasons for this remain uncertain, but may reflect the different demographic profile, differences in  
15 referral patterns and awareness of the disease as well as differences in associated comorbidities. Taking into  
16 account the variation in distribution of types of diagnoses of AF, where in New Zealand nearly 70% of the AF  
17 diagnoses were in addition to another principal diagnosis, compared with nearly 60% in Denmark, the difference in  
18 incidence rates of hospitalizations with AF may be due to differences in the health system in the two countries. In  
19 Denmark the health system is funded by taxes, and all contacts with the health system are free of charge for the  
20 patient. By contrast, in New Zealand only parts of the health system are fully funded by taxes, notably hospital  
21 care, whereas visits to the general practitioner are subject to a small user charge. Given the unspecific symptoms of  
22 AF, patients might be less likely to contact their general practitioner when experiencing symptoms with  
23 palpitations and shortness of breath. This is supported by the fact that AF patients with stroke often have non-  
24 recognized AF [41]. Consequently, a larger proportion of the New Zealand population may be undiagnosed with  
25 AF than in Denmark.  
26  
27

28  
29 In the present study, we found some differences in comorbidities (Table 2). Despite the similar age distribution  
30 between countries, especially congestive heart failure was more frequent in the New Zealand cohort and diabetes  
31 more frequent in the Danish cohort. This difference may reflect the fact that additional diagnoses for AF are used  
32 more frequently in the New Zealand cohort than in the Danish, and may be a random finding in patients referred  
33 with symptoms of congestive heart failure.  
34  
35

36  
37 This study found that there was a minor decrease in the 30-days case fatality risk for stroke in AF patients during  
38 the study period in Denmark, but an increase in New Zealand. Our findings indicate that the 30-days case fatality  
39 risk in Denmark was higher than in New Zealand until the late nineties, whereas afterwards the difference does not  
40 seem evident. This may be due to differences in anticoagulant treatments between the two countries but this also  
41 remains tentative.  
42  
43

## 44 45 46 47 48 49 50 51 52 53 54 55 56 **5. Conclusion** 57 58 59 60

1  
2  
3 This is the first concurrent analysis of the epidemiology of stroke in AF patients in nationwide population data  
4 from two western countries, one in the northern hemisphere and one in the southern hemisphere. We showed that  
5 the incidence rates of hospitalization with stroke in AF patients exhibit a marked seasonal variation in both  
6 countries, which is characterized by a peak in winter and a trough in summer. Both countries have also shown a  
7 downward trend in hospitalizations with stroke in AF patients, despite a pronounced increase in AF  
8 hospitalizations. This trend, seasonal variation and differences in comorbidities and distribution of types of  
9 diagnoses between the two countries, merit further study. Such research could help us better understand the clinical  
10 epidemiology and public health impact of AF and its complications and identify opportunities for better prevention  
11 of AF and stroke.  
12  
13  
14  
15  
16  
17  
18  
19  
20  
21  
22  
23  
24  
25  
26  
27  
28  
29  
30  
31  
32  
33  
34  
35  
36  
37  
38  
39  
40  
41  
42  
43  
44  
45  
46  
47  
48  
49  
50  
51  
52  
53  
54  
55  
56  
57  
58  
59  
60

## References

- 1 Atrial Fibrillation Working Group. Independent predictors of stroke in patients with atrial fibrillation: a systematic review. *Neurology* 2007;**69**:546–554.
- 2 Hughes M, Lip GYH. Stroke and thromboembolism in atrial fibrillation: a systematic review of stroke risk factors, risk stratification schema and cost effectiveness data. *Thromb Haemostasis* 2008;**99**:295–304.
- 3 Rasmussen LH, Larsen TB, Due KM, *et al.* Impact of vascular disease in predicting stroke and death in patients with atrial fibrillation: the Danish Diet, Cancer and Health cohort study. *J Thromb Haemostasis* 2011;**9**:1301–1307.
- 4 Spencer FA, Goldberg RJ, Becker RC, *et al.* Seasonal distribution of acute myocardial infarction in the second National Registry of Myocardial Infarction. *J Am Coll Cardiol* 1998;**31**:1226–1233.
- 5 Manfredini R, Manfredini F, Boari B, *et al.* Seasonal and weekly patterns of hospital admissions for nonfatal and fatal myocardial infarction. *Am J Emerg Med* 2009;**27**:1097–1103.
- 6 Arntz HR, Willich SN, Schreiber C, *et al.* Diurnal, weekly and seasonal variation of sudden death. Population-based analysis of 24,061 consecutive cases. *Eur Heart J* 2000;**21**:315–320.
- 7 Mehta RH, Manfredini R, Hassan F, *et al.* Chronobiological Patterns of Acute Aortic Dissection. *Circulation* 2002;**106**:1110–1115.
- 8 Gallerani M, Boari B, Smolensky MH, *et al.* Seasonal variation in occurrence of pulmonary embolism: analysis of the database of the Emilia-Romagna region, Italy. *Chronobiol Int J Biol Med Rhythm Res* 2007;**24**:143–160.
- 9 Gallerani M, Boari B, Manfredini F, *et al.* Seasonal variation in heart failure hospitalization. *Clin Cardiol* 2011;**34**:389–394.
- 10 Manfredini R, Gallerani M, Portaluppi F, *et al.* Chronobiological Patterns of Onset of Acute Cerebrovascular Diseases. *Thromb Res* 1997;**88**:451–463.
- 11 Manfredini R, Manfredini F, Boari B, *et al.* Temporal patterns of hospital admissions for transient ischemic attack: a retrospective population-based study in the Emilia-Romagna region of Italy. *Clin Appl Thromb Hemost* 2010;**16**:153–160.
- 12 Watanabe E, Kuno Y, Takasuga H, *et al.* Seasonal variation in paroxysmal atrial fibrillation documented by 24-hour Holter electrocardiogram. *Heart Rhythm* 2007;**4**:27–31.
- 13 Frost L, Johnsen SP, Pedersen L, *et al.* Seasonal Variation in Hospital Discharge Diagnosis of Atrial Fibrillation: A Population-Based Study. *Epidemiology* 2002;**13**:211–215.
- 14 Upshur REG, Moineddin R, Crighton EJ, *et al.* Is there a clinically significant seasonal component to hospital admissions for atrial fibrillation? *BMC Health Serv Res* 2004;**4**:5.
- 15 Murphy NF, Stewart S, MacIntyre K, *et al.* Seasonal variation in morbidity and mortality related to atrial fibrillation. *Int J Cardiol* 2004;**97**:283–288.



- 1  
2  
3  
4 16 Frost L, Vukelic Andersen L, Mortensen LS, *et al.* Seasonal variation in stroke and stroke-associated mortality in patients with a hospital diagnosis of nonvalvular atrial fibrillation or flutter. A population-based study in Denmark. *Neuroepidemiology* 2006;**26**:220–225.
- 7  
8 17 Spengos K, Vemmos K, Tzivgoulis G, *et al.* Diurnal and seasonal variation of stroke incidence in patients with cardioembolic stroke due to atrial fibrillation. *Neuroepidemiology* 2003;**22**:204–210.
- 11  
12 18 Fischer T, Lundbye-Christensen S, Johnsen SP, *et al.* Secular trends and seasonality in first-time hospitalization for acute myocardial infarction - a Danish population-based study. *Int J Cardiol* 2004;**97**:425–431.
- 15  
16 19 Harrell FE. *Regression Modelling Strategies - with Applications to Linear Models, Logistic regression and Survival Analysis*. 1st ed. Springer 2001.
- 18  
19 20 R Development Core Team. R: A Language and Environment for Statistical Computing. 2010.
- 21  
22 21 Christensen AL. Peak2Trough: Estimation of the peak-to-trough ratio of a seasonal variation component. R-package version 1.2. 2012.
- 23  
24 22 Frost L, Andersen LV, Vestergaard P, *et al.* Trend in mortality after stroke with atrial fibrillation. *Am J Med* 2007;**120**:47–53.
- 26  
27 23 Rix TA, Riahi S, Overvad K, *et al.* Validity of the diagnoses atrial fibrillation and atrial flutter in a Danish patient registry. *Scand Cardiovasc J* 2012;**46**:149-153.
- 29  
30 24 Krarup L-H, Boysen G, Janjua H, *et al.* Validity of stroke diagnoses in a National Register of Patients. *Neuroepidemiology* 2007;**28**:150–154.
- 32  
33 25 Jørgensen HS, Plesner A-M, Hübbe P, *et al.* Marked Increase of Stroke Incidence in Men Between 1972 and 1990 in Frederiksberg, Denmark. *Stroke* 1992;**23**:1701–1704.
- 36  
37 26 Chen F, Florkowski CM, Dever M, *et al.* Death Certification and New Zealand Health Information Service (NZHIS) statistics for diabetes mellitus: an under-recognised health problem. *Diabetes Res Clin Pract* 2004;**63**:113–118.
- 39  
40 27 Brennan PJ, Greenberg G, Miall WE, *et al.* Seasonal variation in arterial blood pressure. *Br Med J* 1982;**285**:919–923.
- 43  
44 28 Kochar MS, Ristow S, Kalbfleisch JH. Effect of seasonal temperature change on blood pressure in a treated hypertensive population. *J Clin Hypertens* 1985;**1**:49–52.
- 46  
47 29 Fisman DN. Seasonality of infectious diseases. *Annual Review of Public Health* 2007;**28**:127–143.
- 49  
50 30 Howden-Chapman P, Crane J, Chapman R, *et al.* Improving health and energy efficiency through community-based housing interventions. *Int J Public Health* 2011;**56**:583–588.
- 52  
53 31 Hales S, Blakely T, Foster RH, *et al.* Seasonal patterns of mortality in relation to social factors. *J Epidemiol Community* 2012;**66**:379-384.
- 55  
56 32 Petersen P, Godtfredsen J. Embolic complications in paroxysmal atrial fibrillation. *Stroke* 1986;**17**:622–626.
- 58  
59  
60

- 1  
2  
3  
4 33 Atrial Fibrillation Investigators. Risk factors for stroke and efficacy of antithrombotic therapy in  
5 atrial fibrillation. Analysis of pooled data from five randomized controlled trials. *Arch Intern Med*  
6 1994;**154**:1449–1457.
- 7  
8 34 Stroke Prevention. Warfarin versus aspirin for prevention of thromboembolism in atrial fibrillation:  
9 Stroke Prevention in Atrial Fibrillation II Study. *Lancet* 1994;**343**:687–691.
- 10  
11 35 Frost L, Engholm G, Møller H, *et al.* Decrease in mortality in patients with a hospital diagnosis of  
12 atrial fibrillation in Denmark during the period 1980-1993. *Eur Heart J* 1999;**20**:1592–1599.
- 13  
14 36 O'Donnell MJ, Xavier D, Liu L, *et al.* Risk factors for ischaemic and intracerebral haemorrhagic  
15 stroke in 22 countries (the INTERSTROKE study): a case-control study. *Lancet* 2010;**376**:112–  
16 123.
- 17  
18 37 Rothwell PM, Algra A, Amarenco P. Medical treatment in acute and long-term secondary  
19 prevention after transient ischaemic attack and ischaemic stroke. *Lancet* 2011;**377**:1681–1692.
- 20  
21 38 Wattigney WA, Mensah GA, Croft JB. Increasing trends in hospitalization for atrial fibrillation in  
22 the United States, 1985 through 1999: implications for primary prevention. *Circulation*  
23 2003;**108**:711–716.
- 24  
25 39 Stewart S, MacIntyre K, MacLeod MM, *et al.* Trends in hospital activity, morbidity and case  
26 fatality related to atrial fibrillation in Scotland, 1986-1996. *Eur Heart J* 2001;**22**:693–701.
- 27  
28 40 Humphries KH, Jackevicius C, Gong Y, *et al.* Population rates of hospitalization for atrial  
29 fibrillation/flutter in Canada. *Can J Cardiol* 2004;**20**:869–876.
- 30  
31 41 Lip GYH. Stroke in atrial fibrillation: epidemiology and thromboprophylaxis. *J Thromb*  
32 *Haemostasis* 2011;**9**:344–251.
- 33  
34  
35  
36  
37  
38  
39  
40  
41  
42  
43  
44  
45  
46  
47  
48  
49  
50  
51  
52  
53  
54  
55  
56  
57  
58  
59  
60

Table 1: Demographic description of patients with atrial fibrillation in Denmark and New Zealand

|                                    | Total   |             | Women   |             | Men     |             |
|------------------------------------|---------|-------------|---------|-------------|---------|-------------|
| <b>Denmark</b>                     |         |             |         |             |         |             |
| Number of AF                       | 243,381 | (100%)      | 116,395 | (47.8%)     | 126,986 | (52.2%)     |
| Age at AF, years<br>(median (IQR)) | 75.2    | (70.7-84.6) | 78.4    | (62.4-79.5) | 71.9    | (62.4-79.5) |
| AF                                 |         |             |         |             |         |             |
| 427.31 (ICD-8)                     | 75,739  | (31.1%)     | 37,680  | (32.4%)     | 38,059  | (30.0%)     |
| 427.32 (ICD-8)                     | 7,050   | (2.9%)      | 2,834   | (2.4%)      | 4,216   | (3.3%)      |
| I48 (ICD-10)                       | 160,592 | (66.0%)     | 75,81   | (65.2%)     | 84,711  | (66.7%)     |
| Diagnosis type                     |         |             |         |             |         |             |
| Principal                          | 103,846 | (42.7%)     | 47,585  | (40.9%)     | 56,261  | (44.3%)     |
| Additional                         | 139,535 | (57.3%)     | 68,810  | (59.1%)     | 70,725  | (55.7%)     |
| Weekly counts<br>(median (IQR))    | 142     | (99-211)    | 69      | (48-99)     | 74      | (50-112)    |
| <b>New Zealand</b>                 |         |             |         |             |         |             |
| Number of AF                       | 51,480  | (100%)      | 24,883  | (48.3%)     | 26,597  | (51.7%)     |
| Age at AF, years<br>(median (IQR)) | 75.8    | (70.4-84.3) | 78.1    | (65.0-80.3) | 73.6    | (65.0-80.3) |
| AF                                 |         |             |         |             |         |             |
| 427.93 (ICD-9)                     | 17,705  | (34.4%)     | 8,682   | (34.9%)     | 9,023   | (33.9%)     |
| 427.94 (ICD-9)                     | 1,389   | (2.7%)      | 515     | (2.1%)      | 874     | (3.3%)      |
| I48 (ICD-10)                       | 32,386  | (62.9%)     | 15,686  | (63.0%)     | 16,700  | (62.8%)     |
| Diagnosis type                     |         |             |         |             |         |             |
| Principal                          | 15,501  | (30.1%)     | 7,810   | (31.4%)     | 7,692   | (28.9%)     |
| Additional                         | 35,978  | (69.9%)     | 17,073  | (68.6%)     | 18,905  | (71.1%)     |
| Weekly counts<br>(median (IQR))    | 53      | (41-63)     | 25      | (19-31)     | 27      | (21-33)     |

AF: Atrial fibrillation, ICD: International Classification of Diseases, IQR: Inter quartile range

Table 2: Comorbidities and age distribution among patients hospitalized with atrial fibrillation having at least one comorbid disorder in Denmark and New Zealand

|                                                                          | Denmark | New Zealand |
|--------------------------------------------------------------------------|---------|-------------|
| <b>Characteristics</b>                                                   |         |             |
| Percentage of all patients with AF having at least one comorbid disorder | 32.5    | 53.3        |
| Age, years (at time of AF)                                               |         |             |
| Age $\geq$ 75 years                                                      | 50.7    | 52.8        |
| Age 65-74                                                                | 26.6    | 27.1        |
| Women                                                                    | 47.8    | 48.3        |
| Congestive heart failure                                                 | 9.6     | 28.4        |
| Hypertension                                                             | 11.5    | 11.9        |
| Diabetes                                                                 | 6.2     | 4.4         |
| Acute myocardial infarction                                              | 10.3    | 15.5        |
| Peripheral arterial disease                                              | 3.5     | 5.8         |
| Coronary artery disease                                                  | 11.2    | 16.8        |

The comorbid conditions were registered if they preceded an incident diagnosis of AF.

Data are percentages.

Table 3: Demographic description of patients with stroke having atrial fibrillation in Denmark and New Zealand

|                                     | Total  |             | Women  |             | Men    |             |
|-------------------------------------|--------|-------------|--------|-------------|--------|-------------|
| <b>Denmark</b>                      |        |             |        |             |        |             |
| Number of strokes                   | 36,088 | (100%)      | 19,872 | (55%)       | 16,216 | (45%)       |
| Age at stroke, years (median (IQR)) | 79.5   | (76.0-86.4) | 81.6   | (69.8-82.4) | 76.7   | (69.8-82.4) |
| Stroke                              |        |             |        |             |        |             |
| 433 (ICD-8)                         | 2,452  | (6.8%)      | 1,279  | (6.4%)      | 1,173  | (7.2%)      |
| 434 (ICD-8)                         | 1,139  | (3.2%)      | 556    | (2.8%)      | 583    | (3.6%)      |
| 436 (ICD-8)                         | 8,274  | (22.9%)     | 4,730  | (23.8%)     | 3,544  | (21.9%)     |
| I63 (ICD-10)                        | 9,771  | (27.1%)     | 5,262  | (26.5%)     | 4,509  | (27.8%)     |
| I64 (ICD-10)                        | 14,452 | (40.0%)     | 8,045  | (40.5%)     | 6,407  | (39.5%)     |
| Diagnosis type                      |        |             |        |             |        |             |
| Principal                           | 27,094 | (75.1%)     | 15,110 | (76.0%)     | 11,984 | (73.9%)     |
| Additional                          | 8,994  | (24.9%)     | 4,762  | (24.0%)     | 4,232  | (26.1%)     |
| Weekly counts (median (IQR))        | 22     | (14-31)     | 12     | (8-17)      | 10     | (6-14)      |
| Time to stroke, days (median (IQR)) | 380    | (0-1572)    | 365    | (0-1528)    | 397    | (0-1634)    |
| <b>New Zealand</b>                  |        |             |        |             |        |             |
| Number of strokes                   | 7,518  | (100%)      | 4,104  | (54.6%)     | 3,414  | (45.4%)     |
| Age at stroke, years (median (IQR)) | 80.0   | (75.5-86.7) | 81.8   | (70.8-83.7) | 77.9   | (70.8-83.7) |
| Stroke                              |        |             |        |             |        |             |
| 433 (ICD-9)                         | 109    | (1.4%)      | 43     | (1%)        | 66     | (1.9%)      |
| 434 (ICD-9)                         | 654    | (8.7%)      | 337    | (8.2%)      | 317    | (9.3%)      |
| 436 (ICD-9)                         | 1,288  | (17.1%)     | 709    | (17.3%)     | 579    | (17.0%)     |
| I63 (ICD-10)                        | 3,581  | (47.6%)     | 1,999  | (48.7%)     | 1,582  | (46.3%)     |
| I64 (ICD-10)                        | 1,886  | (25.1%)     | 1,016  | (24.8%)     | 870    | (25.5%)     |
| Diagnosis type                      |        |             |        |             |        |             |
| Principal                           | 5,916  | (78.7%)     | 3,227  | (78.6%)     | 2,689  | (78.8%)     |
| Additional                          | 1,602  | (21.3%)     | 877    | (21.4%)     | 725    | (21.2%)     |
| Weekly counts (median (IQR))        | 7      | (5-10)      | 4      | (2-6)       | 3      | (2-5)       |
| Time to stroke, days (median (IQR)) | 645    | (14-1776)   | 641    | (17-1749)   | 654    | (10-1814)   |

AF: atrial fibrillation, ICD: International Classification of Diseases, IQR: Inter quartile range

Figure 1: Observed incidence rates of first-time hospitalizations with a principal or additional diagnosis of atrial fibrillation per 1,000 person-years for the Danish and New Zealand population.



Figure 2: Estimated seasonal variation in incidence rates of hospitalisations with stroke in patients with atrial fibrillation in Denmark (solid line) and New Zealand (dashed line) adjusted for overall trend. The seasonal variation is represented as the percentual deviation in incidence rates from annual median, and incidence rates are aggregated to weekly observations. Shaded bands represent 95% confidence intervals.

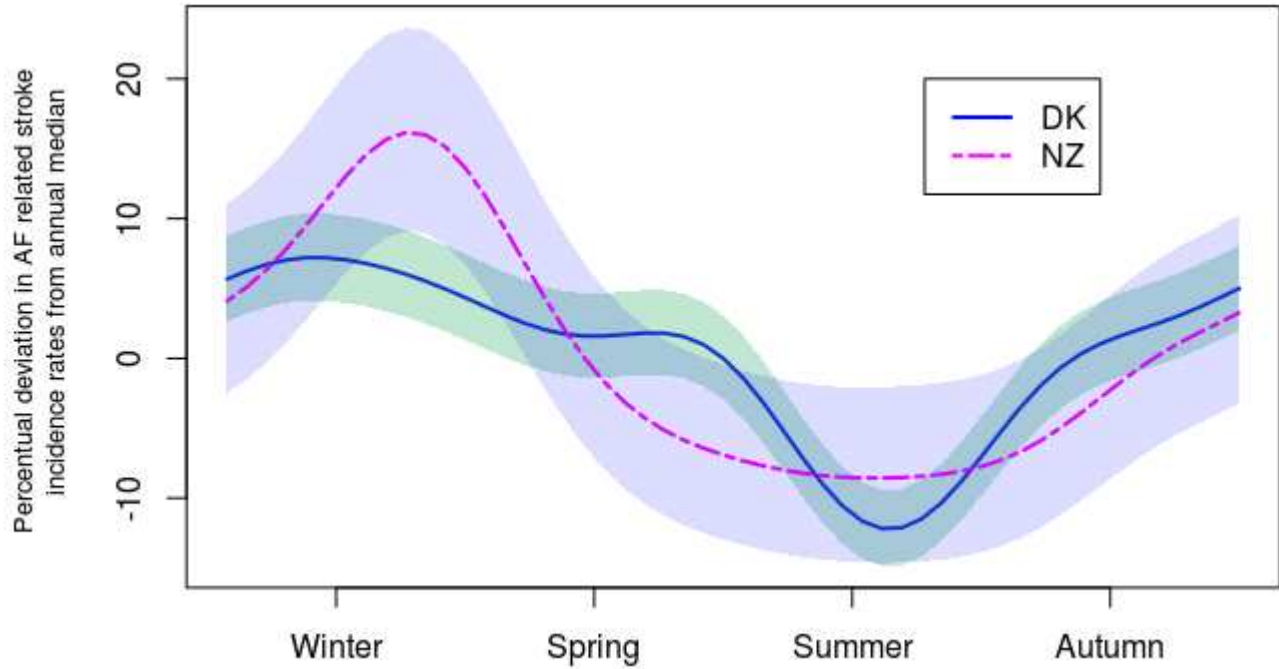

Figure 3: Estimated overall trend of Danish (solid line) and New Zealand (dashed line) weekly incidence rates of hospitalisations with stroke in atrial fibrillation patients per 100 person-years adjusted for seasonality. Shaded bands represent 95% confidence intervals.





1  
2  
3  
4  
5  
6  
7  
8  
9  
10  
11  
12  
13  
14  
15  
16  
17  
18  
19  
20  
21  
22  
23  
24  
25  
26  
27  
28  
29  
30  
31  
32  
33  
34  
35  
36  
37  
38  
39  
40  
41  
42  
43  
44  
45  
46  
47  
48  
49  
50  
51  
52  
53  
54  
55  
56  
57  
58  
59  
60

Figure 4: Observed 30-days case fatality risk for stroke in atrial fibrillation patients in Denmark and New Zealand



review only

STROBE Statement—Checklist of items that should be included in reports of *cohort studies*

|                              | Item No | Recommendation                                                                                                                                                                                                                                                                                                                                                                                                |
|------------------------------|---------|---------------------------------------------------------------------------------------------------------------------------------------------------------------------------------------------------------------------------------------------------------------------------------------------------------------------------------------------------------------------------------------------------------------|
| <b>Title and abstract</b>    | 1       | (a) Indicate the study's design with a commonly used term in the title or the abstract<br>(b) Provide in the abstract an informative and balanced summary of what was done and what was found                                                                                                                                                                                                                 |
| <b>Introduction</b>          |         |                                                                                                                                                                                                                                                                                                                                                                                                               |
| Background/rationale         | 2       | Explain the scientific background and rationale for the investigation being reported                                                                                                                                                                                                                                                                                                                          |
| Objectives                   | 3       | State specific objectives, including any prespecified hypotheses                                                                                                                                                                                                                                                                                                                                              |
| <b>Methods</b>               |         |                                                                                                                                                                                                                                                                                                                                                                                                               |
| Study design                 | 4       | Present key elements of study design early in the paper                                                                                                                                                                                                                                                                                                                                                       |
| Setting                      | 5       | Describe the setting, locations, and relevant dates, including periods of recruitment, exposure, follow-up, and data collection                                                                                                                                                                                                                                                                               |
| Participants                 | 6       | (a) Give the eligibility criteria, and the sources and methods of selection of participants. Describe methods of follow-up<br>(b) For matched studies, give matching criteria and number of exposed and unexposed                                                                                                                                                                                             |
| Variables                    | 7       | Clearly define all outcomes, exposures, predictors, potential confounders, and effect modifiers. Give diagnostic criteria, if applicable                                                                                                                                                                                                                                                                      |
| Data sources/<br>measurement | 8*      | For each variable of interest, give sources of data and details of methods of assessment (measurement). Describe comparability of assessment methods if there is more than one group                                                                                                                                                                                                                          |
| Bias                         | 9       | Describe any efforts to address potential sources of bias                                                                                                                                                                                                                                                                                                                                                     |
| Study size                   | 10      | Explain how the study size was arrived at                                                                                                                                                                                                                                                                                                                                                                     |
| Quantitative variables       | 11      | Explain how quantitative variables were handled in the analyses. If applicable, describe which groupings were chosen and why                                                                                                                                                                                                                                                                                  |
| Statistical methods          | 12      | (a) Describe all statistical methods, including those used to control for confounding<br>(b) Describe any methods used to examine subgroups and interactions<br>(c) Explain how missing data were addressed<br>(d) If applicable, explain how loss to follow-up was addressed<br>(e) Describe any sensitivity analyses                                                                                        |
| <b>Results</b>               |         |                                                                                                                                                                                                                                                                                                                                                                                                               |
| Participants                 | 13*     | (a) Report numbers of individuals at each stage of study—eg numbers potentially eligible, examined for eligibility, confirmed eligible, included in the study, completing follow-up, and analysed<br>(b) Give reasons for non-participation at each stage<br>(c) Consider use of a flow diagram                                                                                                               |
| Descriptive data             | 14*     | (a) Give characteristics of study participants (eg demographic, clinical, social) and information on exposures and potential confounders<br>(b) Indicate number of participants with missing data for each variable of interest<br>(c) Summarise follow-up time (eg, average and total amount)                                                                                                                |
| Outcome data                 | 15*     | Report numbers of outcome events or summary measures over time                                                                                                                                                                                                                                                                                                                                                |
| Main results                 | 16      | (a) Give unadjusted estimates and, if applicable, confounder-adjusted estimates and their precision (eg, 95% confidence interval). Make clear which confounders were adjusted for and why they were included<br>(b) Report category boundaries when continuous variables were categorized<br>(c) If relevant, consider translating estimates of relative risk into absolute risk for a meaningful time period |

|    |                          |    |                                                                                        |
|----|--------------------------|----|----------------------------------------------------------------------------------------|
| 1  | Other analyses           | 17 | Report other analyses done—eg analyses of subgroups and interactions, and              |
| 2  |                          |    | sensitivity analyses                                                                   |
| 3  | <b>Discussion</b>        |    |                                                                                        |
| 4  | Key results              | 18 | Summarise key results with reference to study objectives                               |
| 5  | Limitations              | 19 | Discuss limitations of the study, taking into account sources of potential bias or     |
| 6  |                          |    | imprecision. Discuss both direction and magnitude of any potential bias                |
| 7  | Interpretation           | 20 | Give a cautious overall interpretation of results considering objectives, limitations, |
| 8  |                          |    | multiplicity of analyses, results from similar studies, and other relevant evidence    |
| 9  | Generalisability         | 21 | Discuss the generalisability (external validity) of the study results                  |
| 10 | <b>Other information</b> |    |                                                                                        |
| 11 | Funding                  | 22 | Give the source of funding and the role of the funders for the present study and, if   |
| 12 |                          |    | applicable, for the original study on which the present article is based               |
| 13 |                          |    |                                                                                        |
| 14 |                          |    |                                                                                        |
| 15 |                          |    |                                                                                        |
| 16 |                          |    |                                                                                        |
| 17 |                          |    |                                                                                        |
| 18 |                          |    |                                                                                        |
| 19 |                          |    |                                                                                        |
| 20 |                          |    |                                                                                        |
| 21 |                          |    |                                                                                        |
| 22 |                          |    |                                                                                        |
| 23 |                          |    |                                                                                        |
| 24 |                          |    |                                                                                        |
| 25 |                          |    |                                                                                        |
| 26 |                          |    |                                                                                        |
| 27 |                          |    |                                                                                        |
| 28 |                          |    |                                                                                        |
| 29 |                          |    |                                                                                        |
| 30 |                          |    |                                                                                        |
| 31 |                          |    |                                                                                        |
| 32 |                          |    |                                                                                        |
| 33 |                          |    |                                                                                        |
| 34 |                          |    |                                                                                        |
| 35 |                          |    |                                                                                        |
| 36 |                          |    |                                                                                        |
| 37 |                          |    |                                                                                        |
| 38 |                          |    |                                                                                        |
| 39 |                          |    |                                                                                        |
| 40 |                          |    |                                                                                        |
| 41 |                          |    |                                                                                        |
| 42 |                          |    |                                                                                        |
| 43 |                          |    |                                                                                        |
| 44 |                          |    |                                                                                        |
| 45 |                          |    |                                                                                        |
| 46 |                          |    |                                                                                        |
| 47 |                          |    |                                                                                        |
| 48 |                          |    |                                                                                        |
| 49 |                          |    |                                                                                        |
| 50 |                          |    |                                                                                        |
| 51 |                          |    |                                                                                        |
| 52 |                          |    |                                                                                        |
| 53 |                          |    |                                                                                        |
| 54 |                          |    |                                                                                        |
| 55 |                          |    |                                                                                        |
| 56 |                          |    |                                                                                        |
| 57 |                          |    |                                                                                        |
| 58 |                          |    |                                                                                        |
| 59 |                          |    |                                                                                        |
| 60 |                          |    |                                                                                        |

\*Give information separately for exposed and unexposed groups.

**Note:** An Explanation and Elaboration article discusses each checklist item and gives methodological background and published examples of transparent reporting. The STROBE checklist is best used in conjunction with this article (freely available on the Web sites of PLoS Medicine at <http://www.plosmedicine.org/>, Annals of Internal Medicine at <http://www.annals.org/>, and Epidemiology at <http://www.epidem.com/>). Information on the STROBE Initiative is available at <http://www.strobe-statement.org>.
